# Supplementary material for: Amplification of luminescence of stable radicals by coordination to NHC–gold(i) complex
Source: Royal Society of Chemistry journal article supplement (doi:10.1039/d1cc06555f), 2022-01-01
Supplement: d1cc06555f1.pdf [file d1cc06555f1.pdf]

## Supplementary Information

# Amplification of luminescence of stable radical by coordination to NHC–gold(I) complex

Yohei Hattori,<sup>\*a</sup> Ryota Kitajima,<sup>a</sup> Ryota Matsuoka,<sup>b</sup> Tetsuro Kusamoto,<sup>b</sup> Hiroshi Nishihara<sup>c</sup> and  
Kingo Uchida<sup>a</sup>

<sup>a</sup>Materials Chemistry Course, Faculty of Advanced Science and Technology, Ryukoku University,  
Seta, Otsu, Shiga 520-2194, Japan.

<sup>b</sup>Department of Life and Coordination-Complex Molecular Science, Institute for Molecular Science,  
5-1 Higashiyama, Myodaiji, Okazaki, Aichi 444-8787, Japan.

<sup>c</sup>Research Institute for Science and Technology, Tokyo University of Science, 2641, Yamazaki, Noda,  
Chiba 278-8510, Japan.

## Contents

|                                                                           |     |
|---------------------------------------------------------------------------|-----|
| EXPERIMENTAL SECTION                                                      | S1  |
| Table S1 Photostability under 370 nm UV irradiation                       | S5  |
| Table S2 Crystallographic data                                            | S6  |
| Table S3 Summary of absorption and emission                               | S7  |
| Table S4 Angles and the lengths in DFT optimized structure                | S7  |
| Fig. S1 ESR spectra                                                       | S8  |
| Fig. S2 Photostability                                                    | S8  |
| Fig. S3 Crystal structure of 4SbF <sub>6</sub> ·THF·cyclohexane           | S9  |
| Fig. S4 Excitation spectra                                                | S9  |
| Cartesian coordinates of all the optimized geometries by DFT calculations | S10 |
| Abstracted results of TD-DFT calculations                                 | S23 |

## EXPERIMENTAL SECTION

Chloro[1,3-dicyclohexylimidazol-2-ylidene]gold(I), chloro[1,3-bis(2,6-diisopropylphenyl)-4,5-dihydroimidazol-2-ylidene]gold(I), chloro(*N,N*-dimethylbenzimidazol-2-ylidene)gold(I) were prepared according to literature procedures.<sup>[1,2,3]</sup> F<sub>2</sub>PyBTM was synthesized according to previous report.<sup>[4]</sup> Commercially available compounds were used as received without further purification. ESR spectra were recorded with a JEOL JES-FR30EX spectrometer with X-band microwave. Sample solutions were charged in a 2.5mm $\phi$  sample tube. Magnetic field was calibrated with the Mn<sup>2+</sup>/MgO standard. Mass spectrometry was performed with a JEOL-JMS-S3000 (MALDI-Spiral-TOF MS) mass spectrometer with DCTB (20 mg/mL in CHCl<sub>3</sub>) as a matrix and TFANA (1 mg/mL in THF) as a cationization agent. Absorption and emission spectra were monitored on Hitachi U-4150 spectrophotometer and Hitachi F-7100 fluorescence spectrophotometer, respectively. Photostability under 370 nm light were recorded with a JASCO FP-8600KS spectrofluorometer. Absolute luminescence quantum yields and fluorescence lifetimes were measured using Hamamatsu Photonics Quantaury QY C11347 and Quantaury Tau C11367, respectively. Elemental analysis was conducted at Center for Organic Elemental Microanalysis, Graduate School of Pharmaceutical Sciences, Kyoto University (1SbF<sub>6</sub>, 2SbF<sub>6</sub>, 3SbF<sub>6</sub>, and 4SbF<sub>6</sub>) and NAIST (5SbF<sub>6</sub>).

### Synthesis of [Au<sup>I</sup>(F<sub>2</sub>PyBTM)(IPr)]SbF<sub>6</sub> (1SbF<sub>6</sub>)

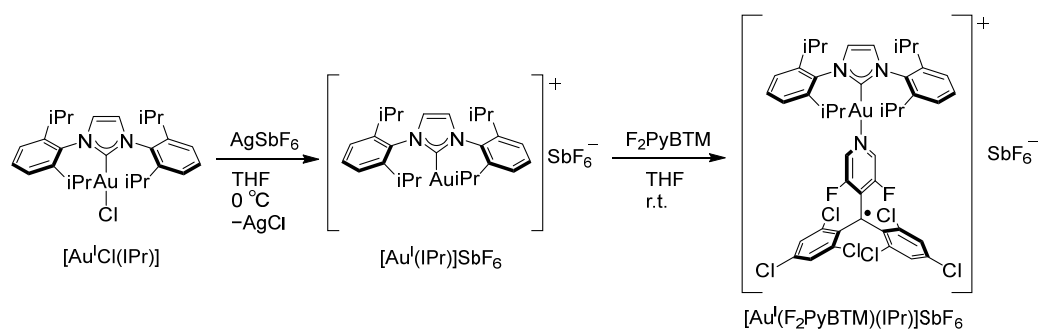

Under a nitrogen atmosphere, chloro[1,3-bis(2,6-diisopropylphenyl)imidazol-2-ylidene]gold(I) (31.1 mg, 0.0504 mmol) was dissolved in dry THF (2 mL) and silver hexafluoroantimonate (17.2 mg, 0.0501 mmol) was added at 0°C, stirred for 15 min, and filtered. The filtrate was added to a solution of F<sub>2</sub>PyBTM (24.7 mg, 0.0507 mmol) in THF (2 mL), and stirred at room temperature for 30 min, and then evaporated. Red powder was precipitated from dichloromethane-hexane, washed with hexane, and dried in vacuo to afford [Au<sup>I</sup>(F<sub>2</sub>PyBTM)(IPr)]SbF<sub>6</sub> (45.9 mg, 0.0351 mmol, 70% yield). **ESI-TOF-MS** m/z: [Au<sup>I</sup>(F<sub>2</sub>PyBTM)(IPr)]<sup>+</sup> Calcd for C<sub>45</sub>H<sub>42</sub>N<sub>3</sub>AuCl<sub>6</sub>F<sub>2</sub> 1069.1144; Found 1069.1106. **Elemental Analysis** Found: C, 41.21; H, 3.39; N, 3.01. Calc. for C<sub>45</sub>H<sub>42</sub>N<sub>3</sub>F<sub>8</sub>Cl<sub>6</sub>SbAu: C, 41.31; H, 3.24; N, 3.21%.

### Synthesis of [Au<sup>I</sup>(F<sub>2</sub>PyBTM)(IMes)]SbF<sub>6</sub> (2SbF<sub>6</sub>)

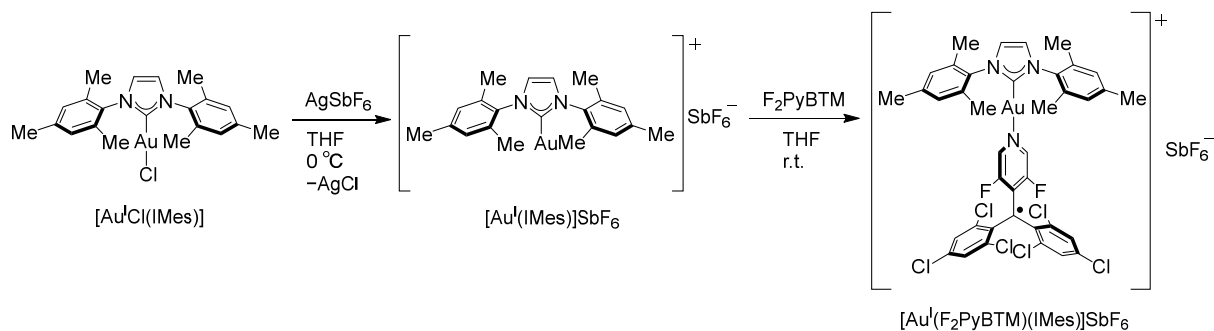

Under a nitrogen atmosphere, chloro[1,3-bis(2,4,6-trimethylphenyl)imidazol-2-ylidene]gold(I) (26.8 mg, 0.0499 mmol) was dissolved in dry THF (2 mL) and silver hexafluoroantimonate (17.4 mg, 0.0506 mmol) was added at 0°C, stirred for 15 min, and filtered. The filtrate was added to a solution of F<sub>2</sub>PyBTM (24.4 mg, 0.0501 mmol) in THF (2 mL), and stirred at room temperature for 30 min, and then evaporated. Red powder was precipitated from dichloromethane-hexane, washed with hexane, and dried in vacuo to afford [Au<sup>I</sup>(F<sub>2</sub>PyBTM)(IMes)]SbF<sub>6</sub> (47.6 mg, 0.0389 mmol, 78% yield). **ESI-TOF-MS** m/z: [Au<sup>I</sup>(F<sub>2</sub>PyBTM)(IMes)]<sup>+</sup> Calcd for C<sub>39</sub>H<sub>30</sub>N<sub>3</sub>AuCl<sub>6</sub>F<sub>2</sub> 985.0204; Found 985.0182. **Elemental Analysis** Found: C, 38.34; H, 2.59; N, 3.56. Calc. for C<sub>39</sub>H<sub>30</sub>N<sub>3</sub>F<sub>8</sub>Cl<sub>6</sub>SbAu: C, 38.27; H, 2.47; N, 3.43%.

### Synthesis of [Au<sup>I</sup>(F<sub>2</sub>PyBTM)(ICy)]SbF<sub>6</sub> (3SbF<sub>6</sub>)

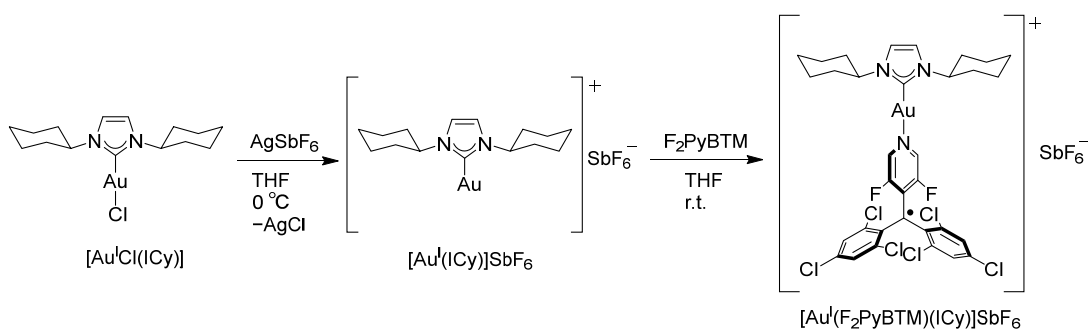

Under an argon atmosphere, chloro(1,3-dicyclohexylimidazol-2-ylidene)gold(I) (42.9 mg, 0.0923 mmol) was dissolved in dry THF (3 mL) and silver hexafluoroantimonate (36.8 mg, 0.107 mmol) was added at 0°C, stirred for 15 min, and filtered. The filtrate was added to a solution of F<sub>2</sub>PyBTM (45.5 mg, 0.0934 mmol) in THF (2 mL), and stirred at room temperature for 30 min, and then evaporated. Red sticky solid was precipitated from dichloromethane-hexane. The solid was reprecipitated from THF-hexane twice and dried in vacuo to afford [Au<sup>I</sup>(F<sub>2</sub>PyBTM)(ICy)]SbF<sub>6</sub> (90.8 mg, 0.0788 mmol, 85% yield). **HRMS** (MALDI-TOF MS) m/z calcd for C<sub>33</sub>H<sub>30</sub>N<sub>3</sub>F<sub>2</sub>Cl<sub>6</sub>Au<sup>+</sup>: 913.01990 [M]<sup>+</sup>; found: 913.01982. **Elemental Analysis** Found: C, 35.02; H, 2.99; N, 3.57. Calc. for C<sub>33</sub>H<sub>30</sub>N<sub>3</sub>F<sub>8</sub>Cl<sub>6</sub>SbAu: C, 34.41; H, 2.62; N, 3.65%. This product probably contains solvent molecules such as THF in crystals like Fig. S3. Calc. for 3SbF<sub>6</sub>·0.3THF, C<sub>34.2</sub>H<sub>32.1</sub>N<sub>3</sub>O<sub>0.3</sub>F<sub>8</sub>Cl<sub>6</sub>SbAu: C, 35.01; H, 2.76; N, 3.58%.

### Synthesis of [Au<sup>I</sup>(F<sub>2</sub>PyBTM)(SIPr)]SbF<sub>6</sub> (4SbF<sub>6</sub>)

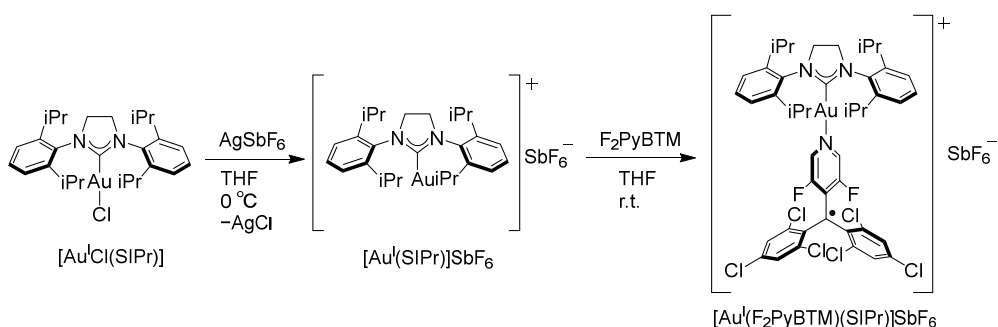

Under an argon atmosphere, chloro[1,3-bis(2,6-diisopropylphenyl)-4,5-dihydroimidazol-2-ylidene]gold(I) (62.3 mg, 0.100 mmol) was dissolved in dry THF (2 mL) and silver hexafluoroantimonate (34.4 mg, 0.100 mmol) in dry THF (2 mL) was added at 0°C, stirred for 15 min, and filtered. The filtrate was added to a solution of F<sub>2</sub>PyBTM (48.8 mg, 0.100 mmol) in THF (2 mL), and stirred at room temperature for 30 min, and then evaporated. Red powder was precipitated from dichloromethane-hexane, washed with hexane. The solid was recrystallized from acetone-water and dried in vacuo to afford [Au<sup>I</sup>(F<sub>2</sub>PyBTM)(SIPr)]SbF<sub>6</sub> (41.8 mg, 0.0313 mmol, 31% yield). **HRMS**

(MALDI-TOF MS)  $m/z$  calcd for  $C_{45}H_{44}N_3F_2Cl_6Au^+$ : 1071.12945  $[M]^+$ ; found: 1071.12950. **Elemental Analysis** Found: C, 41.52; H, 3.25; N, 3.01. Calc. for  $C_{45}H_{44}N_3F_8Cl_6SbAu$ : C, 41.25; H, 3.38; N, 3.21%.

### Synthesis of $[Au^I(F_2PyBTM)(Me_2-bimy)]SbF_6$ (**5SbF<sub>6</sub>**)

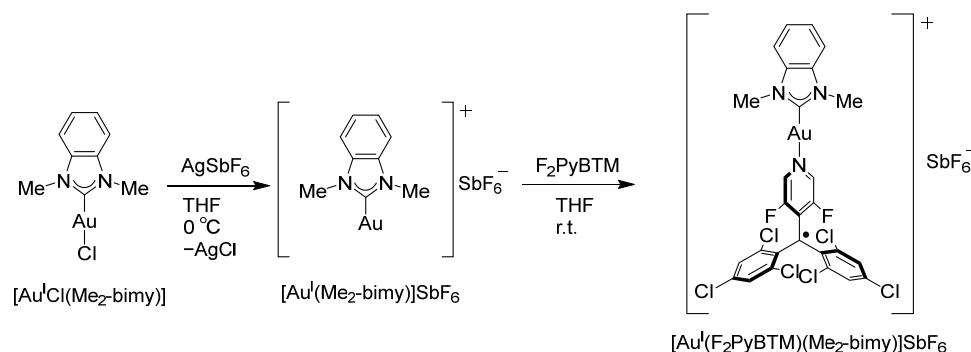

Under an argon atmosphere, chloro(*N,N*-dimethylbenzimidazol-2-ylidene)gold(I) (37.8 mg, 0.0989 mmol) was dissolved in dry THF (2 mL) and silver hexafluoroantimonate (37.6 mg, 0.109 mmol) in dry THF (2 mL) was added at 0°C, stirred for 15 min, and filtered. The filtrate was added to a solution of  $F_2PyBTM$  (44.8 mg, 0.0920 mmol) in THF (2 mL), and stirred at room temperature for 30 min, and then evaporated. Red powder was precipitated from dichloromethane-hexane, washed with hexane, and dried in vacuo to afford  $[Au^I(F_2PyBTM)(IMe_2-bimy)]SbF_6$  (66.0 mg, 0.0619 mmol, 67% yield). **HRMS** (MALDI-TOF MS)  $m/z$  calcd for  $C_{27}H_{16}N_3F_2Cl_6Au^+$ : 826.91035  $[M]^+$ ; found: 826.90949. **Elemental Analysis** Found: C, 30.50; H, 1.28; N, 3.88. Calc. for  $C_{27}H_{16}N_3F_8Cl_6SbAu$ : C, 30.43; H, 1.51; N, 3.94%.

### X-ray structural analysis

Red single crystals of  $4SbF_6 \cdot THF \cdot cyclohexane$  were obtained by diffusing cyclohexane into a THF solution. Red single crystals of  $5SbF_6$  were obtained by diffusing cyclohexane into a dichloromethane solution. Diffraction data for X-ray analysis were collected with a Rigaku VariMax RAPID II diffractometer. The crystal was kept at 103.15 K during data collection. Using Olex2,<sup>[5]</sup> the structure was solved with the SHELXT<sup>[6]</sup> structure solution program using Intrinsic Phasing and refined with the SHELXL<sup>[7]</sup> refinement package using Least Squares minimisation.

The crystallographic data are listed in Table S2. Crystal structure data (CIF, CCDC 2122598 and 2122599) can be obtained free of charge via the Internet at <http://pubs.acs.org> and from The Cambridge Crystallographic Data Centre via [www.ccdc.cam.ac.uk/data\\_request/cif](http://www.ccdc.cam.ac.uk/data_request/cif).

### Computational details

DFT calculations of cations  $1^+$ ,  $2^+$ ,  $3^+$ ,  $4^+$ ,  $5^+$ , and  $[Au^I(F_2PyBTM)PPh_3]^+$  were executed using the Gaussian16 program package.<sup>[8]</sup> The geometries of the compounds were optimized without symmetry constraints. Calculations were performed using M06 functional<sup>[9]</sup> with the SDD basis set (Au) and the 6-31G(d) basis set (H, C, N, F, (P), Cl), and the solvent effect (dichloromethane) was treated using the polarizable continuum model.<sup>[10,11]</sup> *Surface=SAS* option was used to converge the structural optimization calculation of  $1^+$ . Cartesian coordinates of all the optimized geometries are listed in the supporting information. Frequency calculations were carried out to ensure that the optimized geometries were minima on the potential energy surface, in which no imaginary frequencies were observed

in any of the compounds. TD-DFT calculations were performed using B3LYP to calculate the first 15 doublet transitions.

## References

1. M. V. Baker, P. J. Barnard, S. J. Berners-Price, S. K. Brayshaw, J. L. Hickey, B. W. Skelton and A. H. White, *J. Organomet. Chem.*, 2005, **690**, 5625–5635.
2. P. de Frémont, N. M. Scott, E. D. Stevens and S. P. Nolan, *Organometallics*, 2005, **24**, 2411–2418.
3. H. M. J. Wang, C. Y. L. Chen and I. J. B. Lin, *Organometallics*, 1999, **18**, 1216–1223.
4. Y. Hattori, T. Kusamoto, H. Nishihara, *RSC Adv.*, 2015, **5**, 64802–64805.
5. O. V. Dolomanov, L. J. Bourhis, R. J. Gildea, J. A. K. Howard and H. Puschmann, *J. Appl. Cryst.*, 2009, **42**, 339–341.
6. G.M. Sheldrick, *Acta Cryst.*, 2015, **A71**, 3–8.
7. G. M. Sheldrick, *Acta Cryst.*, 2015, **C71**, 3–8.
8. Gaussian 16, Revision A03, M. J. Frisch, G. W. Trucks, H. B. Schlegel, G. E. Scuseria, M. A. Robb, J. R. Cheeseman, G. Scalmani, V. Barone, G. A. Petersson, H. Nakatsuji, X. Li, M. Caricato, A. V. Marenich, J. Bloino, B. G. Janesko, R. Gomperts, B. Mennucci, H. P. Hratchian, J. V. Ortiz, A. F. Izmaylov, J. L. Sonnenberg, D. Williams-Young, F. Ding, F. Lipparini, F. Egidi, J. Goings, B. Peng, A. Petrone, T. Henderson, D. Ranasinghe, V. G. Zakrzewski, J. Gao, N. Rega, G. Zheng, W. Liang, M. Hada, M. Ehara, K. Toyota, R. Fukuda, J. Hasegawa, M. Ishida, T. Nakajima, Y. Honda, O. Kitao, H. Nakai, T. Vreven, K. Throssell, J. A. Montgomery Jr., J. E. Peralta, F. Ogliaro, M. J. Bearpark, J. J. Heyd, E. N. Brothers, K. N. Kudin, V. N. Staroverov, T. A. Keith, R. Kobayashi, J. Normand, K. Raghavachari, A. P. Rendell, J. C. Burant, S. S. Iyengar, J. Tomasi, M. Cossi, J. M. Millam, M. Klene, C. Adamo, R. Cammi, J. W. Ochterski, R. L. Martin, K. Morokuma, O. Farkas, J. B. Foresman and D. J. Fox, Gaussian, Inc., Wallingford CT, 2016.
9. Y. Zhao and D. G. Truhlar, *Theor. Chem. Acc.*, 2008, **120**, 215–241.
10. G. Scalmani and M. J. Frisch, *J. Chem. Phys.*, 2010, **132**, 114110.
11. R. Improta, V. Barone, G. Scalmani and M. J. Frisch, *J. Chem. Phys.*, 2006, **125**, 054103.

**Table S1.** Photostability of the new radical complexes in dichloromethane under 370 nm UV irradiation

| Exp. no.                | $t_{1/2}$ [s] (PyBTM) | $t_{1/2}$ [s] (1SbF <sub>6</sub> ) | $t_{1/2}$ [s] (2SbF <sub>6</sub> ) | $t_{1/2}$ [s] (3SbF <sub>6</sub> ) | $t_{1/2}$ [s] (4SbF <sub>6</sub> ) | $t_{1/2}$ [s] (5SbF <sub>6</sub> ) |
|-------------------------|-----------------------|------------------------------------|------------------------------------|------------------------------------|------------------------------------|------------------------------------|
| 1                       | 314                   | 2418                               | 998                                | 2096                               | 434                                | 2602                               |
| 2                       | 242                   | 2308                               | 1162                               | 1824                               | 488                                | 1824                               |
| 3                       | 290                   | 3136                               | 1314                               | 2174                               | 548                                | 2174                               |
| Ave.                    | 282                   | 2621                               | 1158                               | 2031                               | 490                                | 2512                               |
| $\sigma$                | 37                    | 450                                | 158                                | 184                                | 57                                 | 124                                |
| Relative Photostability | 1.00 ± 0.13           | 9.29 ± 1.59                        | 4.11 ± 0.56                        | 7.20 ± 0.65                        | 1.74 ± 0.20                        | 8.91 ± 0.44                        |

**Table S2.** Crystallographic data of **4SbF<sub>6</sub>·THF·cyclohexane** and **5SbF<sub>6</sub>**

|                                                       | <b>4SbF<sub>6</sub>·THF·cyclohexane</b>                                             | <b>5SbF<sub>6</sub></b>                                                            |
|-------------------------------------------------------|-------------------------------------------------------------------------------------|------------------------------------------------------------------------------------|
| Empirical formula                                     | C <sub>55</sub> H <sub>64</sub> AuCl <sub>6</sub> F <sub>8</sub> N <sub>3</sub> OSb | C <sub>27</sub> H <sub>16</sub> AuCl <sub>6</sub> F <sub>8</sub> N <sub>3</sub> Sb |
| Formula weight                                        | 1466.50                                                                             | 1065.84                                                                            |
| Temperature/K                                         | 103.15                                                                              | 103.15                                                                             |
| Crystal system                                        | triclinic                                                                           | monoclinic                                                                         |
| Space group                                           | <i>P</i> -1                                                                         | <i>P</i> 2 <sub>1</sub> / <i>c</i>                                                 |
| <i>a</i> / Å                                          | 12.4979(2)                                                                          | 15.9293(5)                                                                         |
| <i>b</i> / Å                                          | 21.0791(4)                                                                          | 11.4765(4)                                                                         |
| <i>c</i> / Å                                          | 22.2535(4)                                                                          | 17.8993(5)                                                                         |
| $\alpha$ / °                                          | 90.337(6)                                                                           | 90                                                                                 |
| $\beta$ / °                                           | 95.247(7)                                                                           | 95.454(7)                                                                          |
| $\gamma$ / °                                          | 91.396(6)                                                                           | 90                                                                                 |
| <i>V</i> / Å <sup>3</sup>                             | 5836.07(19)                                                                         | 3257.42(18)                                                                        |
| <i>Z</i>                                              | 4                                                                                   | 4                                                                                  |
| $\rho_{\text{calcd}}$ / g cm <sup>-3</sup>            | 1.669                                                                               | 2.173                                                                              |
| $\mu$ / mm <sup>-1</sup>                              | 3.315                                                                               | 5.892                                                                              |
| F(000)                                                | 2908.0                                                                              | 2012.0                                                                             |
| Crystal size / mm <sup>3</sup>                        | 0.13 × 0.08 × 0.02                                                                  | 0.3 × 0.13 × 0.02                                                                  |
| Radiation                                             | MoK $\alpha$ ( $\lambda$ = 0.71075)                                                 | MoK $\alpha$ ( $\lambda$ = 0.71075)                                                |
| 2 $\theta$ range for data collection/°                | 3.604 to 50.702                                                                     | 4.828 to 54.946                                                                    |
| Index ranges                                          | -15 ≤ <i>h</i> ≤ 15, -25 ≤ <i>k</i> ≤ 25, -26 ≤ <i>l</i> ≤ 26                       | -20 ≤ <i>h</i> ≤ 20, -14 ≤ <i>k</i> ≤ 14, -22 ≤ <i>l</i> ≤ 23                      |
| Reflections collected                                 | 67463                                                                               | 52270                                                                              |
| Independent reflections                               | 21345 [R <sub>int</sub> = 0.0534, R <sub>sigma</sub> = 0.0497]                      | 7456 [R <sub>int</sub> = 0.0634, R <sub>sigma</sub> = 0.0352]                      |
| Data/restraints/parameters                            | 21345/0/1333                                                                        | 7456/0/417                                                                         |
| Goodness-of-fit on F <sup>2</sup>                     | 1.034                                                                               | 1.075                                                                              |
| Final R indexes [ <i>I</i> ≥ 2 $\sigma$ ( <i>I</i> )] | R <sub>1</sub> = 0.0490, wR <sub>2</sub> = 0.1167                                   | R <sub>1</sub> = 0.0314, wR <sub>2</sub> = 0.0781                                  |
| Final R indexes [all data]                            | R <sub>1</sub> = 0.0616, wR <sub>2</sub> = 0.1237                                   | R <sub>1</sub> = 0.0344, wR <sub>2</sub> = 0.0797                                  |
| Largest diff. peak/hole / e Å <sup>-3</sup>           | 1.98/-1.19                                                                          | 2.07/-0.62                                                                         |
| CCDC No.                                              | 2122599                                                                             | 2122598                                                                            |

**Table S3.** Summary of absorption and emission in dichloromethane

|                                                                          | $\lambda_{\text{abs}}$ [nm] ( $\epsilon$ [ $10^3 \text{ M}^{-1} \text{ cm}^{-1}$ ]) | $\lambda_{\text{em}}$ [nm] |
|--------------------------------------------------------------------------|-------------------------------------------------------------------------------------|----------------------------|
| <b>1SbF<sub>6</sub></b>                                                  | 372 (17), 415 (11), 557 (2.0)                                                       | 629                        |
| <b>2SbF<sub>6</sub></b>                                                  | 371 (21), 412 (12), 555 (2.3)                                                       | 626                        |
| <b>3SbF<sub>6</sub></b>                                                  | 371 (9.1), 410 (6.3), 554 (1.1)                                                     | 631                        |
| <b>4SbF<sub>6</sub></b>                                                  | 368 (13), 417 (6.3), 555 (1.2)                                                      | 630                        |
| <b>5SbF<sub>6</sub></b>                                                  | 280 (21), 287 (20), 371 (14), 413 (8.7), 555 (1.6)                                  | 629                        |
| <b>[Au<sup>I</sup>(F<sub>2</sub>PyBTM)PPh<sub>3</sub>]BF<sub>4</sub></b> | 367 (12), 419 (6.1), 552 (1.1)                                                      | 630                        |

**Table S4.** The dihedral angles between NHC ring and pyridine ring and the lengths of coordination bonds of DFT optimized structure

|                                                                          | <i>Dihedral angle / °</i> | <i>Coordination bond length / Å</i> |
|--------------------------------------------------------------------------|---------------------------|-------------------------------------|
| <b>1SbF<sub>6</sub></b>                                                  | 26                        | 2.118 (Au–N), 2.020 (Au–C)          |
| <b>2SbF<sub>6</sub></b>                                                  | 75                        | 2.125 (Au–N), 2.021 (Au–C)          |
| <b>3SbF<sub>6</sub></b>                                                  | 88                        | 2.129 (Au–N), 2.013 (Au–C)          |
| <b>4SbF<sub>6</sub></b>                                                  | 25                        | 2.123 (Au–N), 2.026 (Au–C)          |
| <b>5SbF<sub>6</sub></b>                                                  | 88                        | 2.127 (Au–N), 2.028 (Au–C)          |
| <b>[Au<sup>I</sup>(F<sub>2</sub>PyBTM)PPh<sub>3</sub>]BF<sub>4</sub></b> |                           | 2.144 (Au–N), 2.311 (Au–P)          |



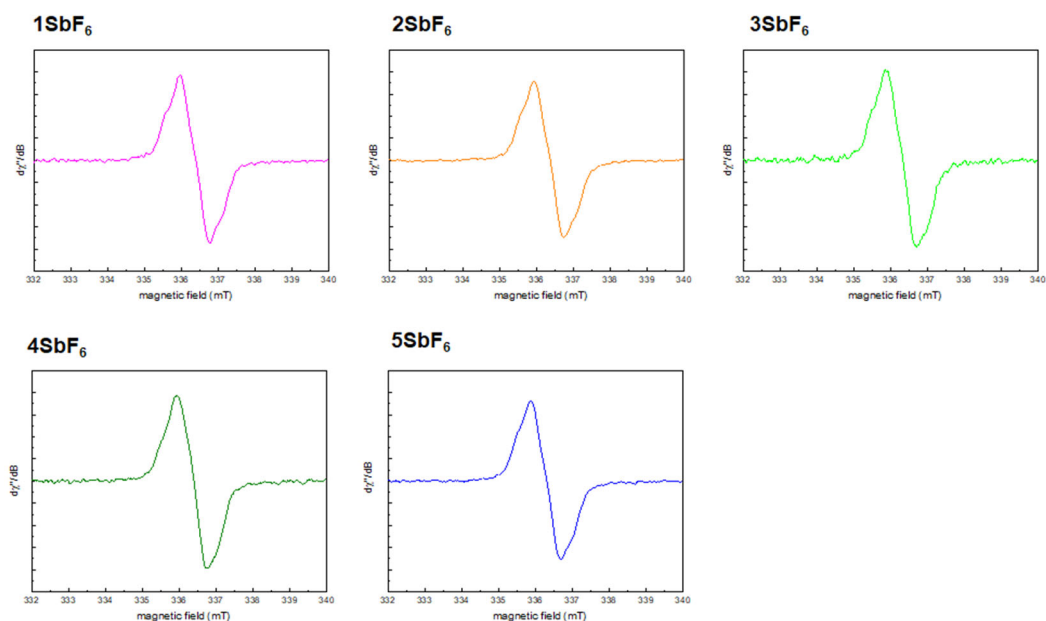

**Fig. S1** ESR spectra of  $1\text{SbF}_6$ – $5\text{SbF}_6$  in dichloromethane. The  $g$  factors of  $1\text{SbF}_6$ – $5\text{SbF}_6$  were 2.005, 2.005, 2.005, 2.004, and 2.005, respectively.

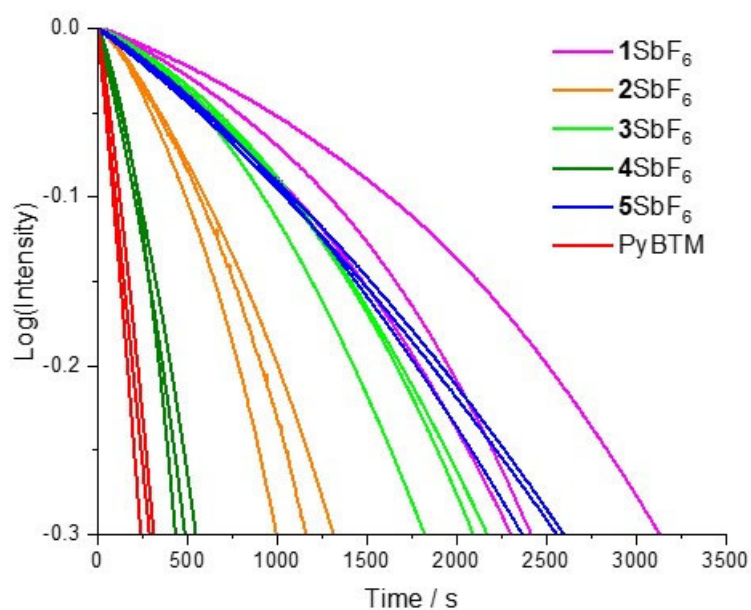

**Fig. S2** Plots showing the emission decay of the radicals in dichloromethane under continuous excitation with light at  $\lambda_{\text{ex}} = 370 \text{ nm} \pm 10 \text{ nm}$ . The emission was monitored at the peak emission.

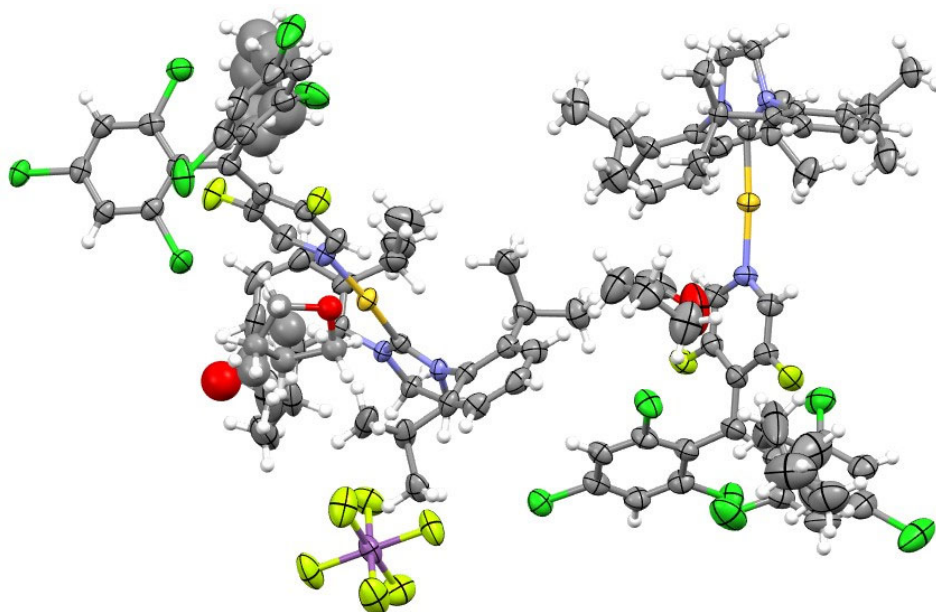

**Fig. S3** Crystal structure of  $4\text{SbF}_6 \cdot \text{THF} \cdot \text{cyclohexane}$  with thermal ellipsoids at the 50% probability level.

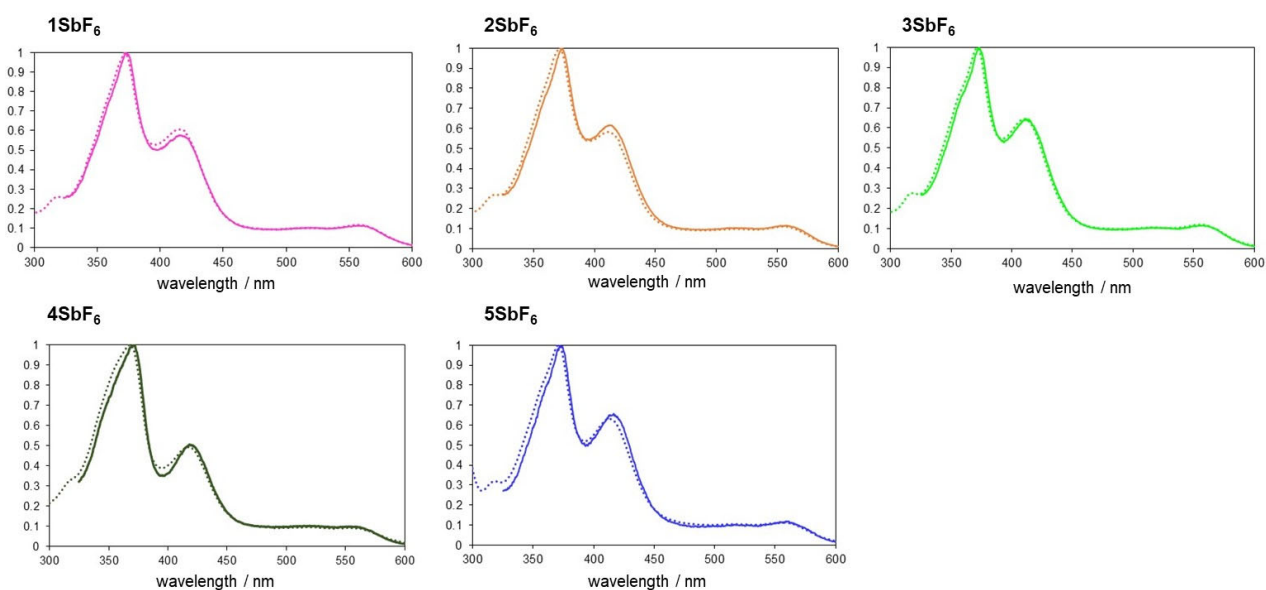

**Fig. S4** Excitation spectra of  $1\text{SbF}_6$ – $5\text{SbF}_6$  in dichloromethane. Normalized absorption spectra are shown as dotted lines for comparison.

Cartesian coordinates of all the optimized geometries by DFT calculation

$\mathbf{I}^+$  (UM06/ SDD(Au), 6-31G(d)(H, C, N, F, Cl)) in dichloromethane

Standard orientation:

| Center<br>Number | Atomic<br>Number | Atomic<br>Type | Coordinates (Angstroms) |           |           |
|------------------|------------------|----------------|-------------------------|-----------|-----------|
|                  |                  |                | X                       | Y         | Z         |
| 1                | 79               | 0              | -2.231903               | -0.013239 | 0.010182  |
| 2                | 17               | 0              | 6.294403                | -0.377746 | 2.213468  |
| 3                | 17               | 0              | 7.323103                | -5.153648 | 0.032930  |
| 4                | 17               | 0              | 6.294520                | 0.336574  | -2.212831 |
| 5                | 17               | 0              | 7.283443                | 5.117817  | -0.025180 |
| 6                | 17               | 0              | 3.445493                | 2.085426  | 2.142141  |
| 7                | 17               | 0              | 3.467963                | -2.152698 | -2.146252 |
| 8                | 7                | 0              | -0.114143               | -0.039588 | -0.005346 |
| 9                | 6                | 0              | 6.685223                | -2.702828 | 0.971735  |
| 10               | 6                | 0              | 2.721683                | -0.035080 | -0.005412 |
| 11               | 6                | 0              | 1.949048                | -1.027143 | 0.629477  |
| 12               | 6                | 0              | 0.569788                | -1.012039 | 0.621064  |
| 13               | 6                | 0              | 0.566982                | 0.934264  | -0.633409 |
| 14               | 6                | 0              | 1.945991                | 0.953309  | -0.642419 |
| 15               | 6                | 0              | 4.163249                | -0.030074 | -0.002058 |
| 16               | 6                | 0              | 4.897071                | 1.240198  | -0.031484 |
| 17               | 6                | 0              | 4.641799                | 2.280982  | 0.886850  |
| 18               | 6                | 0              | 5.931158                | 1.486570  | -0.958040 |
| 19               | 6                | 0              | 6.665775                | 2.663411  | -0.967992 |
| 20               | 6                | 0              | 6.373346                | 3.643674  | -0.030362 |
| 21               | 6                | 0              | 5.360000                | 3.464483  | 0.903528  |
| 22               | 6                | 0              | 4.907140                | -1.294154 | 0.030620  |
| 23               | 6                | 0              | 5.941658                | -1.531643 | 0.959262  |
| 24               | 6                | 0              | 6.402014                | -3.686374 | 0.034677  |
| 25               | 6                | 0              | 5.389289                | -3.515769 | -0.901437 |
| 26               | 6                | 0              | 4.662177                | -2.337742 | -0.887495 |
| 27               | 1                | 0              | 7.464479                | -2.848882 | 1.714726  |
| 28               | 1                | 0              | 0.011063                | -1.791549 | 1.133404  |
| 29               | 1                | 0              | 0.005492                | 1.712660  | -1.145205 |
| 30               | 1                | 0              | 7.445208                | 2.816272  | -1.709410 |
| 31               | 1                | 0              | 5.144406                | 4.228793  | 1.645133  |
| 32               | 1                | 0              | 5.181055                | -4.282366 | -1.642779 |
| 33               | 9                | 0              | 2.549251                | -2.005507 | 1.286101  |
| 34               | 9                | 0              | 2.543199                | 1.933297  | -1.299485 |

|    |   |   |           |           |           |
|----|---|---|-----------|-----------|-----------|
| 35 | 6 | 0 | -6.412064 | -0.566797 | 0.081091  |
| 36 | 6 | 0 | -6.371129 | 0.781034  | -0.070449 |
| 37 | 6 | 0 | -4.251528 | 0.042492  | 0.017841  |
| 38 | 7 | 0 | -5.099417 | -0.999873 | 0.133034  |
| 39 | 7 | 0 | -5.034066 | 1.135868  | -0.104361 |
| 40 | 1 | 0 | -7.239009 | -1.260949 | 0.155813  |
| 41 | 1 | 0 | -7.154651 | 1.522477  | -0.154693 |
| 42 | 6 | 0 | -4.517957 | 2.471600  | -0.254635 |
| 43 | 6 | 0 | -4.312095 | 3.235221  | 0.902905  |
| 44 | 6 | 0 | -4.205277 | 2.919173  | -1.545326 |
| 45 | 6 | 0 | -3.752834 | 4.501922  | 0.734004  |
| 46 | 6 | 0 | -3.648101 | 4.193939  | -1.655289 |
| 47 | 1 | 0 | -3.570456 | 5.127653  | 1.606695  |
| 48 | 1 | 0 | -3.389294 | 4.581746  | -2.640008 |
| 49 | 6 | 0 | -4.677930 | -2.369649 | 0.256195  |
| 50 | 6 | 0 | -4.523649 | -3.118158 | -0.918213 |
| 51 | 6 | 0 | -4.419724 | -2.873725 | 1.537556  |
| 52 | 6 | 0 | -4.106138 | -4.441585 | -0.775130 |
| 53 | 6 | 0 | -4.001683 | -4.202300 | 1.621899  |
| 54 | 1 | 0 | -3.977082 | -5.061286 | -1.661892 |
| 55 | 1 | 0 | -3.791991 | -4.636301 | 2.599075  |
| 56 | 6 | 0 | -4.427492 | 2.075073  | -2.783280 |
| 57 | 1 | 0 | -4.971450 | 1.162579  | -2.491993 |
| 58 | 6 | 0 | -4.627436 | 2.711171  | 2.288574  |
| 59 | 1 | 0 | -5.252094 | 1.809655  | 2.186268  |
| 60 | 6 | 0 | -4.777714 | -2.541067 | -2.294813 |
| 61 | 1 | 0 | -5.076651 | -1.486714 | -2.183731 |
| 62 | 6 | 0 | -4.551680 | -2.033692 | 2.790312  |
| 63 | 1 | 0 | -4.942219 | -1.042477 | 2.509436  |
| 64 | 6 | 0 | -3.421992 | 4.975132  | -0.529511 |
| 65 | 1 | 0 | -2.986854 | 5.966828  | -0.638141 |
| 66 | 6 | 0 | -3.850536 | -4.978573 | 0.480012  |
| 67 | 1 | 0 | -3.527649 | -6.014122 | 0.569346  |
| 68 | 6 | 0 | -3.342441 | 2.301824  | 3.009682  |
| 69 | 1 | 0 | -2.671369 | 3.163792  | 3.131928  |
| 70 | 1 | 0 | -3.568737 | 1.908194  | 4.009647  |
| 71 | 1 | 0 | -2.793163 | 1.526895  | 2.452259  |
| 72 | 6 | 0 | -3.094768 | 1.639807  | -3.392335 |
| 73 | 1 | 0 | -3.259768 | 1.017962  | -4.282178 |
| 74 | 1 | 0 | -2.496907 | 2.509325  | -3.699923 |
| 75 | 1 | 0 | -2.496927 | 1.054582  | -2.675208 |
| 76 | 6 | 0 | -5.284535 | 2.804287  | -3.815901 |
| 77 | 1 | 0 | -6.241252 | 3.130434  | -3.388855 |

|    |   |   |           |           |           |
|----|---|---|-----------|-----------|-----------|
| 78 | 1 | 0 | -4.774061 | 3.693274  | -4.210071 |
| 79 | 1 | 0 | -5.497378 | 2.145916  | -4.667688 |
| 80 | 6 | 0 | -5.416581 | 3.716814  | 3.122991  |
| 81 | 1 | 0 | -4.816854 | 4.604841  | 3.363709  |
| 82 | 1 | 0 | -6.322543 | 4.054231  | 2.604231  |
| 83 | 1 | 0 | -5.717432 | 3.263248  | 4.075742  |
| 84 | 6 | 0 | -3.185670 | -1.816137 | 3.440207  |
| 85 | 1 | 0 | -3.277031 | -1.182922 | 4.332484  |
| 86 | 1 | 0 | -2.735410 | -2.768507 | 3.752700  |
| 87 | 1 | 0 | -2.487084 | -1.324758 | 2.744167  |
| 88 | 6 | 0 | -3.507001 | -2.559694 | -3.142000 |
| 89 | 1 | 0 | -3.160885 | -3.585457 | -3.328624 |
| 90 | 1 | 0 | -3.689879 | -2.090296 | -4.117613 |
| 91 | 1 | 0 | -2.689189 | -2.015156 | -2.647512 |
| 92 | 6 | 0 | -5.923971 | -3.268516 | -2.994347 |
| 93 | 1 | 0 | -5.680766 | -4.325503 | -3.168778 |
| 94 | 1 | 0 | -6.845493 | -3.233625 | -2.398023 |
| 95 | 1 | 0 | -6.131704 | -2.811720 | -3.970431 |
| 96 | 6 | 0 | -5.539557 | -2.650400 | 3.777882  |
| 97 | 1 | 0 | -6.525164 | -2.801609 | 3.319006  |
| 98 | 1 | 0 | -5.188732 | -3.624931 | 4.143586  |
| 99 | 1 | 0 | -5.666073 | -1.998094 | 4.651316  |

-----

**2<sup>+</sup>** (UM06/ SDD(Au), 6-31G(d)(H, C, N, F, Cl)) in dichloromethane

Standard orientation:

| Center<br>Number | Atomic<br>Number | Atomic<br>Type | Coordinates (Angstroms) |           |           |
|------------------|------------------|----------------|-------------------------|-----------|-----------|
|                  |                  |                | X                       | Y         | Z         |
| 1                | 79               | 0              | -2.688864               | 0.000594  | -0.013357 |
| 2                | 17               | 0              | 5.806867                | -0.678958 | -2.170434 |
| 3                | 17               | 0              | 6.831127                | 4.574701  | -2.361889 |
| 4                | 17               | 0              | 5.800540                | 0.674566  | 2.167265  |
| 5                | 17               | 0              | 6.842334                | -4.574951 | 2.365438  |
| 6                | 17               | 0              | 3.043015                | -2.858471 | -0.995430 |
| 7                | 17               | 0              | 3.030667                | 2.841166  | 0.989343  |
| 8                | 7                | 0              | -0.563447               | -0.009318 | -0.013093 |
| 9                | 6                | 0              | 6.201714                | 1.958723  | -2.101682 |
| 10               | 6                | 0              | 2.268648                | -0.009388 | -0.007704 |
| 11               | 6                | 0              | 1.498246                | 0.588800  | -1.021976 |

|    |   |   |           |           |           |
|----|---|---|-----------|-----------|-----------|
| 12 | 6 | 0 | 0.118895  | 0.577672  | -1.009770 |
| 13 | 6 | 0 | 0.115057  | -0.597218 | 0.985662  |
| 14 | 6 | 0 | 1.494373  | -0.608823 | 1.002882  |
| 15 | 6 | 0 | 3.711622  | -0.006869 | -0.003868 |
| 16 | 6 | 0 | 4.452742  | -1.123889 | 0.595596  |
| 17 | 6 | 0 | 4.217866  | -2.466940 | 0.233772  |
| 18 | 6 | 0 | 5.467069  | -0.921958 | 1.552460  |
| 19 | 6 | 0 | 6.204122  | -1.961528 | 2.101404  |
| 20 | 6 | 0 | 5.929336  | -3.258615 | 1.693762  |
| 21 | 6 | 0 | 4.936215  | -3.527366 | 0.760582  |
| 22 | 6 | 0 | 4.450530  | 1.113617  | -0.600059 |
| 23 | 6 | 0 | 5.467230  | 0.916070  | -1.555107 |
| 24 | 6 | 0 | 5.921516  | 3.254421  | -1.693268 |
| 25 | 6 | 0 | 4.925603  | 3.518820  | -0.761813 |
| 26 | 6 | 0 | 4.209881  | 2.455341  | -0.237533 |
| 27 | 1 | 0 | 6.968268  | 1.760212  | -2.845539 |
| 28 | 1 | 0 | -0.440310 | 1.041019  | -1.817724 |
| 29 | 1 | 0 | -0.447285 | -1.060173 | 1.791668  |
| 30 | 1 | 0 | 6.968566  | -1.759593 | 2.846510  |
| 31 | 1 | 0 | 4.735481  | -4.544433 | 0.435560  |
| 32 | 1 | 0 | 4.720674  | 4.534876  | -0.436245 |
| 33 | 9 | 0 | 2.103919  | 1.169603  | -2.046776 |
| 34 | 9 | 0 | 2.096163  | -1.190168 | 2.029648  |
| 35 | 6 | 0 | -6.851418 | 0.680424  | 0.164945  |
| 36 | 6 | 0 | -6.860096 | -0.623529 | -0.200885 |
| 37 | 6 | 0 | -4.709832 | 0.013161  | -0.014767 |
| 38 | 7 | 0 | -5.521058 | 1.053915  | 0.274297  |
| 39 | 7 | 0 | -5.534969 | -1.015815 | -0.306925 |
| 40 | 1 | 0 | -7.652370 | 1.381055  | 0.359977  |
| 41 | 1 | 0 | -7.670395 | -1.313165 | -0.396557 |
| 42 | 6 | 0 | -5.096386 | -2.337349 | -0.660916 |
| 43 | 6 | 0 | -4.879757 | -2.632082 | -2.009759 |
| 44 | 6 | 0 | -4.900888 | -3.269605 | 0.362817  |
| 45 | 6 | 0 | -4.451583 | -3.920972 | -2.323395 |
| 46 | 6 | 0 | -4.471465 | -4.543352 | -0.003369 |
| 47 | 6 | 0 | -4.246192 | -4.887260 | -1.337614 |
| 48 | 1 | 0 | -4.275416 | -4.177632 | -3.369270 |
| 49 | 1 | 0 | -4.310602 | -5.289836 | 0.776190  |
| 50 | 6 | 0 | -5.064640 | 2.360148  | 0.661112  |
| 51 | 6 | 0 | -4.832903 | 2.610278  | 2.016650  |
| 52 | 6 | 0 | -4.867615 | 3.321671  | -0.334626 |
| 53 | 6 | 0 | -4.389443 | 3.884454  | 2.366806  |
| 54 | 6 | 0 | -4.421756 | 4.578878  | 0.067492  |

|    |   |   |           |           |           |
|----|---|---|-----------|-----------|-----------|
| 55 | 6 | 0 | -4.182548 | 4.879011  | 1.409913  |
| 56 | 1 | 0 | -4.202374 | 4.106413  | 3.418686  |
| 57 | 1 | 0 | -4.258802 | 5.347480  | -0.689802 |
| 58 | 6 | 0 | -3.819205 | -6.276546 | -1.704707 |
| 59 | 1 | 0 | -3.186826 | -6.722004 | -0.927284 |
| 60 | 1 | 0 | -4.690397 | -6.934920 | -1.828328 |
| 61 | 1 | 0 | -3.264740 | -6.291267 | -2.650457 |
| 62 | 6 | 0 | -5.132469 | -2.904905 | 1.798174  |
| 63 | 1 | 0 | -4.445155 | -2.111955 | 2.127912  |
| 64 | 1 | 0 | -6.151361 | -2.529473 | 1.965832  |
| 65 | 1 | 0 | -4.981311 | -3.771899 | 2.450171  |
| 66 | 6 | 0 | -5.085834 | -1.597184 | -3.074153 |
| 67 | 1 | 0 | -6.094349 | -1.163449 | -3.034170 |
| 68 | 1 | 0 | -4.377309 | -0.762900 | -2.965729 |
| 69 | 1 | 0 | -4.943556 | -2.029033 | -4.070554 |
| 70 | 6 | 0 | -5.035503 | 1.543683  | 3.050135  |
| 71 | 1 | 0 | -6.032480 | 1.087437  | 2.980903  |
| 72 | 1 | 0 | -4.305385 | 0.729234  | 2.933002  |
| 73 | 1 | 0 | -4.919866 | 1.952151  | 4.059799  |
| 74 | 6 | 0 | -3.739312 | 6.252225  | 1.816250  |
| 75 | 1 | 0 | -3.108201 | 6.715262  | 1.048108  |
| 76 | 1 | 0 | -4.603164 | 6.914786  | 1.966349  |
| 77 | 1 | 0 | -3.177955 | 6.232850  | 2.757859  |
| 78 | 6 | 0 | -5.115621 | 3.004447  | -1.778341 |
| 79 | 1 | 0 | -4.453775 | 2.201030  | -2.133589 |
| 80 | 1 | 0 | -6.145927 | 2.664256  | -1.950830 |
| 81 | 1 | 0 | -4.942363 | 3.884686  | -2.406639 |

-----

**3<sup>+</sup>** (UM06/ SDD(Au), 6-31G(d)(H, C, N, F, Cl)) in dichloromethane

Standard orientation:

| Center<br>Number | Atomic<br>Number | Atomic<br>Type | Coordinates (Angstroms) |           |           |
|------------------|------------------|----------------|-------------------------|-----------|-----------|
|                  |                  |                | X                       | Y         | Z         |
| 1                | 79               | 0              | -2.939282               | 0.000008  | -0.000020 |
| 2                | 17               | 0              | 5.554289                | -0.830789 | -2.118361 |
| 3                | 17               | 0              | 6.583102                | 4.393523  | -2.693969 |
| 4                | 17               | 0              | 5.554259                | 0.830794  | 2.118380  |
| 5                | 17               | 0              | 6.583069                | -4.393516 | 2.694010  |
| 6                | 17               | 0              | 2.792364                | -2.911458 | -0.787532 |

|    |    |   |           |           |           |
|----|----|---|-----------|-----------|-----------|
| 7  | 17 | 0 | 2.792348  | 2.911457  | 0.787514  |
| 8  | 7  | 0 | -0.810142 | 0.000003  | -0.000024 |
| 9  | 6  | 0 | 5.952038  | 1.804495  | -2.242278 |
| 10 | 6  | 0 | 2.022167  | -0.000001 | -0.000012 |
| 11 | 6  | 0 | 1.250068  | 0.513682  | -1.058151 |
| 12 | 6  | 0 | -0.129377 | 0.502926  | -1.042766 |
| 13 | 6  | 0 | -0.129387 | -0.502922 | 1.042724  |
| 14 | 6  | 0 | 1.250058  | -0.513682 | 1.058120  |
| 15 | 6  | 0 | 3.465500  | 0.000000  | -0.000004 |
| 16 | 6  | 0 | 4.204076  | -1.072444 | 0.679223  |
| 17 | 6  | 0 | 3.965366  | -2.437130 | 0.414383  |
| 18 | 6  | 0 | 5.218267  | -0.804963 | 1.619715  |
| 19 | 6  | 0 | 5.952010  | -1.804490 | 2.242306  |
| 20 | 6  | 0 | 5.673285  | -3.126790 | 1.929102  |
| 21 | 6  | 0 | 4.679812  | -3.459243 | 1.016953  |
| 22 | 6  | 0 | 4.204083  | 1.072445  | -0.679222 |
| 23 | 6  | 0 | 5.218287  | 0.804966  | -1.619700 |
| 24 | 6  | 0 | 5.673309  | 3.126795  | -1.929076 |
| 25 | 6  | 0 | 4.679821  | 3.459245  | -1.016942 |
| 26 | 6  | 0 | 3.965367  | 2.437131  | -0.414384 |
| 27 | 1  | 0 | 6.717034  | 1.551662  | -2.971143 |
| 28 | 1  | 0 | -0.689406 | 0.898587  | -1.885429 |
| 29 | 1  | 0 | -0.689423 | -0.898583 | 1.885383  |
| 30 | 1  | 0 | 6.716994  | -1.551655 | 2.971181  |
| 31 | 1  | 0 | 4.476178  | -4.496468 | 0.765668  |
| 32 | 1  | 0 | 4.476183  | 4.496471  | -0.765659 |
| 33 | 9  | 0 | 1.853415  | 1.007288  | -2.128870 |
| 34 | 9  | 0 | 1.853395  | -1.007288 | 2.128844  |
| 35 | 6  | 0 | -7.101914 | 0.602497  | 0.310420  |
| 36 | 6  | 0 | -7.101913 | -0.602528 | -0.310378 |
| 37 | 6  | 0 | -4.966903 | 0.000001  | -0.000007 |
| 38 | 7  | 0 | -5.780742 | 0.955757  | 0.501355  |
| 39 | 7  | 0 | -5.780741 | -0.955768 | -0.501349 |
| 40 | 1  | 0 | -7.924545 | 1.230009  | 0.624781  |
| 41 | 1  | 0 | -7.924545 | -1.230049 | -0.624721 |
| 42 | 6  | 0 | -5.321475 | 2.230044  | 1.077467  |
| 43 | 6  | 0 | -5.451044 | 3.357055  | 0.059900  |
| 44 | 6  | 0 | -6.046460 | 2.553115  | 2.376424  |
| 45 | 1  | 0 | -4.253313 | 2.072892  | 1.300180  |
| 46 | 6  | 0 | -4.932411 | 4.664551  | 0.649173  |
| 47 | 1  | 0 | -6.513213 | 3.466591  | -0.218123 |
| 48 | 1  | 0 | -4.903484 | 3.087915  | -0.855713 |
| 49 | 6  | 0 | -5.510852 | 3.857843  | 2.958851  |



|    |   |   |           |           |           |
|----|---|---|-----------|-----------|-----------|
| 50 | 1 | 0 | -7.125256 | 2.667860  | 2.180172  |
| 51 | 1 | 0 | -5.932657 | 1.721079  | 3.085389  |
| 52 | 6 | 0 | -5.641460 | 4.999768  | 1.956808  |
| 53 | 1 | 0 | -5.054329 | 5.476027  | -0.080242 |
| 54 | 1 | 0 | -3.849188 | 4.570807  | 0.835961  |
| 55 | 1 | 0 | -6.043120 | 4.093551  | 3.889600  |
| 56 | 1 | 0 | -4.449518 | 3.726613  | 3.228716  |
| 57 | 1 | 0 | -5.239338 | 5.929160  | 2.381961  |
| 58 | 1 | 0 | -6.710083 | 5.182320  | 1.753546  |
| 59 | 6 | 0 | -5.321461 | -2.230046 | -1.077472 |
| 60 | 6 | 0 | -5.450926 | -3.357049 | -0.059884 |
| 61 | 6 | 0 | -6.046513 | -2.553161 | -2.376381 |
| 62 | 1 | 0 | -4.253319 | -2.072856 | -1.300251 |
| 63 | 6 | 0 | -4.932280 | -4.664534 | -0.649172 |
| 64 | 1 | 0 | -6.513074 | -3.466622 | 0.218205  |
| 65 | 1 | 0 | -4.903322 | -3.087878 | 0.855694  |
| 66 | 6 | 0 | -5.510891 | -3.857876 | -2.958825 |
| 67 | 1 | 0 | -7.125292 | -2.667946 | -2.180062 |
| 68 | 1 | 0 | -5.932786 | -1.721131 | -3.085364 |
| 69 | 6 | 0 | -5.641395 | -4.999794 | -1.956760 |
| 70 | 1 | 0 | -5.054123 | -5.476004 | 0.080261  |
| 71 | 1 | 0 | -3.849072 | -4.570751 | -0.836026 |
| 72 | 1 | 0 | -6.043207 | -4.093615 | -3.889538 |
| 73 | 1 | 0 | -4.449578 | -3.726610 | -3.228756 |
| 74 | 1 | 0 | -5.239265 | -5.929175 | -2.381926 |
| 75 | 1 | 0 | -6.709999 | -5.182383 | -1.753431 |

-----

**4<sup>+</sup> (UM06/ SDD(Au), 6-31G(d)(H, C, N, F, Cl)) in dichloromethane**

Standard orientation:

| Center<br>Number | Atomic<br>Number | Atomic<br>Type | Coordinates (Angstroms) |           |           |
|------------------|------------------|----------------|-------------------------|-----------|-----------|
|                  |                  |                | X                       | Y         | Z         |
| 1                | 79               | 0              | -2.207704               | -0.000252 | -0.000264 |
| 2                | 17               | 0              | 6.325825                | 0.461137  | -2.233356 |
| 3                | 17               | 0              | 7.268755                | 5.220694  | 0.067685  |
| 4                | 17               | 0              | 6.325378                | -0.460926 | 2.233598  |
| 5                | 17               | 0              | 7.270022                | -5.220292 | -0.067138 |
| 6                | 17               | 0              | 3.521528                | -2.050957 | -2.245569 |
| 7                | 17               | 0              | 3.520532                | 2.050376  | 2.245183  |

|    |   |   |           |           |           |
|----|---|---|-----------|-----------|-----------|
| 8  | 7 | 0 | -0.089827 | -0.000522 | -0.000519 |
| 9  | 6 | 0 | 6.674841  | 2.765827  | -0.926092 |
| 10 | 6 | 0 | 2.759531  | -0.000314 | -0.000364 |
| 11 | 6 | 0 | 1.977616  | 1.017667  | -0.591369 |
| 12 | 6 | 0 | 0.595667  | 1.002353  | -0.584697 |
| 13 | 6 | 0 | 0.595748  | -1.003308 | 0.583709  |
| 14 | 6 | 0 | 1.977684  | -1.018434 | 0.590512  |
| 15 | 6 | 0 | 4.207036  | -0.000174 | -0.000153 |
| 16 | 6 | 0 | 4.946352  | -1.277315 | -0.010916 |
| 17 | 6 | 0 | 4.695804  | -2.293201 | -0.965976 |
| 18 | 6 | 0 | 5.960292  | -1.572205 | 0.930574  |
| 19 | 6 | 0 | 6.675294  | -2.765539 | 0.926437  |
| 20 | 6 | 0 | 6.382588  | -3.717393 | -0.043905 |
| 21 | 6 | 0 | 5.393036  | -3.493958 | -0.997345 |
| 22 | 6 | 0 | 4.946062  | 1.277159  | 0.010843  |
| 23 | 6 | 0 | 5.960137  | 1.572313  | -0.930414 |
| 24 | 6 | 0 | 6.381685  | 3.717579  | 0.044212  |
| 25 | 6 | 0 | 5.391981  | 3.493876  | 0.997430  |
| 26 | 6 | 0 | 4.695047  | 2.292949  | 0.965869  |
| 27 | 1 | 0 | 7.433502  | 2.950862  | -1.676977 |
| 28 | 1 | 0 | 0.035984  | 1.799369  | -1.059124 |
| 29 | 1 | 0 | 0.036100  | -1.800332 | 1.058167  |
| 30 | 1 | 0 | 7.433827  | -2.950374 | 1.677502  |
| 31 | 1 | 0 | 5.178411  | -4.232114 | -1.760668 |
| 32 | 1 | 0 | 5.177014  | 4.231953  | 1.760732  |
| 33 | 9 | 0 | 2.578035  | 2.036287  | -1.212278 |
| 34 | 9 | 0 | 2.578190  | -2.036940 | 1.211529  |
| 35 | 6 | 0 | -4.224086 | 0.000073  | 0.000063  |
| 36 | 7 | 0 | -4.991784 | 1.087787  | -0.134430 |
| 37 | 7 | 0 | -4.992260 | -1.087191 | 0.135119  |
| 38 | 6 | 0 | -4.516215 | -2.435003 | 0.300490  |
| 39 | 6 | 0 | -4.332175 | -3.234586 | -0.846545 |
| 40 | 6 | 0 | -4.273351 | -2.918467 | 1.602758  |
| 41 | 6 | 0 | -3.872069 | -4.543407 | -0.659884 |
| 42 | 6 | 0 | -3.814943 | -4.234905 | 1.732651  |
| 43 | 1 | 0 | -3.714137 | -5.182153 | -1.524759 |
| 44 | 1 | 0 | -3.613110 | -4.634555 | 2.722924  |
| 45 | 6 | 0 | -4.515167 | 2.435337  | -0.300158 |
| 46 | 6 | 0 | -4.330339 | 3.234873  | 0.846755  |
| 47 | 6 | 0 | -4.272554 | 2.918623  | -1.602534 |
| 48 | 6 | 0 | -3.869680 | 4.543472  | 0.659887  |
| 49 | 6 | 0 | -3.813410 | 4.234785  | -1.732644 |
| 50 | 1 | 0 | -3.711218 | 5.182204  | 1.524676  |

|    |   |   |           |           |           |
|----|---|---|-----------|-----------|-----------|
| 51 | 1 | 0 | -3.611619 | 4.634240  | -2.723003 |
| 52 | 6 | 0 | -4.480888 | -2.066434 | 2.848594  |
| 53 | 1 | 0 | -4.857726 | -1.086808 | 2.534780  |
| 54 | 6 | 0 | -4.600672 | -2.722973 | -2.256347 |
| 55 | 1 | 0 | -4.994738 | -1.703402 | -2.181300 |
| 56 | 6 | 0 | -4.598737 | 2.723489  | 2.256674  |
| 57 | 1 | 0 | -4.992225 | 1.703670  | 2.181890  |
| 58 | 6 | 0 | -4.481119 | 2.066691  | -2.848262 |
| 59 | 1 | 0 | -4.858490 | 1.087332  | -2.534249 |
| 60 | 6 | 0 | -3.614314 | -5.040523 | 0.614936  |
| 61 | 1 | 0 | -3.258843 | -6.060212 | 0.737934  |
| 62 | 6 | 0 | -3.612017 | 5.040374  | -0.615035 |
| 63 | 1 | 0 | -3.256037 | 6.059864  | -0.738198 |
| 64 | 6 | 0 | -3.302215 | -2.646087 | -3.079861 |
| 65 | 1 | 0 | -2.853676 | -3.638070 | -3.211885 |
| 66 | 1 | 0 | -3.508281 | -2.235986 | -4.075812 |
| 67 | 1 | 0 | -2.562092 | -2.001773 | -2.589762 |
| 68 | 6 | 0 | -3.154301 | -1.821922 | 3.590174  |
| 69 | 1 | 0 | -3.319953 | -1.175623 | 4.460360  |
| 70 | 1 | 0 | -2.717173 | -2.761306 | 3.949091  |
| 71 | 1 | 0 | -2.420801 | -1.334155 | 2.936240  |
| 72 | 6 | 0 | -5.531628 | -2.685414 | 3.787998  |
| 73 | 1 | 0 | -6.485913 | -2.843473 | 3.272440  |
| 74 | 1 | 0 | -5.198399 | -3.653590 | 4.179995  |
| 75 | 1 | 0 | -5.710487 | -2.023480 | 4.643387  |
| 76 | 6 | 0 | -5.661277 | -3.572983 | -2.978459 |
| 77 | 1 | 0 | -5.316538 | -4.602519 | -3.130454 |
| 78 | 1 | 0 | -6.597586 | -3.613269 | -2.410017 |
| 79 | 1 | 0 | -5.878558 | -3.146219 | -3.964576 |
| 80 | 6 | 0 | -3.155037 | 1.821243  | -3.590403 |
| 81 | 1 | 0 | -3.321538 | 1.175112  | -4.460553 |
| 82 | 1 | 0 | -2.717331 | 2.760302  | -3.949459 |
| 83 | 1 | 0 | -2.421654 | 1.332888  | -2.936781 |
| 84 | 6 | 0 | -3.300420 | 2.647614  | 3.080466  |
| 85 | 1 | 0 | -2.852714 | 3.639939  | 3.212738  |
| 86 | 1 | 0 | -3.506397 | 2.237275  | 4.076336  |
| 87 | 1 | 0 | -2.559626 | 2.003969  | 2.590504  |
| 88 | 6 | 0 | -5.659948 | 3.573176  | 2.978303  |
| 89 | 1 | 0 | -5.315856 | 4.603009  | 3.129756  |
| 90 | 1 | 0 | -6.596264 | 3.612603  | 2.409810  |
| 91 | 1 | 0 | -5.877021 | 3.146786  | 3.964629  |
| 92 | 6 | 0 | -5.531867 | 2.686377  | -3.787212 |
| 93 | 1 | 0 | -6.485786 | 2.845215  | -3.271212 |

|     |   |   |           |           |           |
|-----|---|---|-----------|-----------|-----------|
| 94  | 1 | 0 | -5.198084 | 3.654274  | -4.179427 |
| 95  | 1 | 0 | -5.711642 | 2.024518  | -4.642467 |
| 96  | 6 | 0 | -6.437154 | 0.761215  | -0.123240 |
| 97  | 1 | 0 | -6.887202 | 1.035794  | -1.082531 |
| 98  | 1 | 0 | -6.941522 | 1.321807  | 0.668792  |
| 99  | 6 | 0 | -6.437475 | -0.759900 | 0.124653  |
| 100 | 1 | 0 | -6.887159 | -1.034259 | 1.084179  |
| 101 | 1 | 0 | -6.942497 | -1.320308 | -0.667095 |

5<sup>+</sup> (UM06/ SDD(Au), 6-31G(d)(H, C, N, F, Cl)) in dichloromethane

Standard orientation:

| Center<br>Number | Atomic<br>Number | Atomic<br>Type | Coordinates (Angstroms) |           |           |
|------------------|------------------|----------------|-------------------------|-----------|-----------|
|                  |                  |                | X                       | Y         | Z         |
| 1                | 79               | 0              | -3.402320               | 0.000074  | 0.000044  |
| 2                | 17               | 0              | 5.093384                | 0.101604  | -2.270287 |
| 3                | 17               | 0              | 6.112116                | 5.111623  | -0.677103 |
| 4                | 17               | 0              | 5.093440                | -0.101735 | 2.270249  |
| 5                | 17               | 0              | 6.111841                | -5.111804 | 0.676996  |
| 6                | 17               | 0              | 2.324716                | -2.338565 | -1.902513 |
| 7                | 17               | 0              | 2.324912                | 2.338619  | 1.902545  |
| 8                | 7                | 0              | -1.275760               | 0.000089  | 0.000078  |
| 9                | 6                | 0              | 5.485051                | 2.561151  | -1.314817 |
| 10               | 6                | 0              | 1.556010                | 0.000040  | 0.000044  |
| 11               | 6                | 0              | 0.784226                | 0.895944  | -0.762126 |
| 12               | 6                | 0              | -0.595158               | 0.879783  | -0.752944 |
| 13               | 6                | 0              | -0.595171               | -0.879623 | 0.753089  |
| 14               | 6                | 0              | 0.784213                | -0.895829 | 0.762240  |
| 15               | 6                | 0              | 2.999387                | 0.000002  | 0.000014  |
| 16               | 6                | 0              | 3.737979                | -1.255682 | 0.184022  |
| 17               | 6                | 0              | 3.497891                | -2.395182 | -0.612005 |
| 18               | 6                | 0              | 4.752968                | -1.394016 | 1.151262  |
| 19               | 6                | 0              | 5.484944                | -2.561300 | 1.314749  |
| 20               | 6                | 0              | 5.204418                | -3.642413 | 0.492213  |
| 21               | 6                | 0              | 4.211070                | -3.574662 | -0.476428 |
| 22               | 6                | 0              | 3.738045                | 1.255642  | -0.184026 |
| 23               | 6                | 0              | 4.753014                | 1.393910  | -1.151298 |
| 24               | 6                | 0              | 5.204614                | 3.642286  | -0.492280 |
| 25               | 6                | 0              | 4.211293                | 3.574599  | 0.476394  |

|    |   |   |            |           |           |
|----|---|---|------------|-----------|-----------|
| 26 | 6 | 0 | 3.498050   | 2.395161  | 0.612001  |
| 27 | 1 | 0 | 6.250146   | 2.626718  | -2.083488 |
| 28 | 1 | 0 | -1.154436  | 1.580294  | -1.366373 |
| 29 | 1 | 0 | -1.154458  | -1.580117 | 1.366530  |
| 30 | 1 | 0 | 6.250060   | -2.626917 | 2.083395  |
| 31 | 1 | 0 | 4.006693   | -4.420354 | -1.127159 |
| 32 | 1 | 0 | 4.006986   | 4.420307  | 1.127126  |
| 33 | 9 | 0 | 1.388121   | 1.778407  | -1.543450 |
| 34 | 9 | 0 | 1.388096   | -1.778310 | 1.543554  |
| 35 | 6 | 0 | -7.566359  | 0.434318  | 0.546265  |
| 36 | 6 | 0 | -7.566309  | -0.434372 | -0.546365 |
| 37 | 6 | 0 | -5.429836  | 0.000037  | -0.000004 |
| 38 | 7 | 0 | -6.232413  | 0.676579  | 0.851886  |
| 39 | 7 | 0 | -6.232336  | -0.676552 | -0.851928 |
| 40 | 6 | 0 | -5.801432  | -1.534400 | -1.940786 |
| 41 | 1 | 0 | -4.708912  | -1.561606 | -1.957671 |
| 42 | 1 | 0 | -6.187135  | -2.548457 | -1.791363 |
| 43 | 1 | 0 | -6.169169  | -1.140047 | -2.894092 |
| 44 | 6 | 0 | -5.801605  | 1.534457  | 1.940757  |
| 45 | 1 | 0 | -6.169356  | 1.140086  | 2.894051  |
| 46 | 1 | 0 | -4.709088  | 1.561730  | 1.957686  |
| 47 | 1 | 0 | -6.187364  | 2.548491  | 1.791315  |
| 48 | 6 | 0 | -8.748527  | 0.891818  | 1.119361  |
| 49 | 6 | 0 | -8.748423  | -0.891947 | -1.119511 |
| 50 | 1 | 0 | -8.750353  | -1.569897 | -1.970046 |
| 51 | 1 | 0 | -8.750538  | 1.569765  | 1.969897  |
| 52 | 6 | 0 | -9.930122  | 0.437555  | 0.548819  |
| 53 | 1 | 0 | -10.880086 | 0.767891  | 0.962840  |
| 54 | 6 | 0 | -9.930071  | -0.437761 | -0.549020 |
| 55 | 1 | 0 | -10.879996 | -0.768158 | -0.963079 |

[Au<sup>I</sup>(F<sub>2</sub>PyBTM)PPh<sub>3</sub>]<sup>+</sup> (UM06 / SDD(Au), 6-31G(d)(H, C, N, F, P, Cl)) in dichloromethane

Standard orientation:

| Center<br>Number | Atomic<br>Number | Atomic<br>Type | Coordinates (Angstroms) |           |          |
|------------------|------------------|----------------|-------------------------|-----------|----------|
|                  |                  |                | X                       | Y         | Z        |
| 1                | 79               | 0              | 2.615159                | -0.027043 | 0.039128 |
| 2                | 17               | 0              | -5.909936               | 0.273921  | 2.254443 |
| 3                | 17               | 0              | -6.882384               | 5.165913  | 0.302512 |

|    |    |   |           |           |           |
|----|----|---|-----------|-----------|-----------|
| 4  | 17 | 0 | -5.868201 | -0.233782 | -2.274939 |
| 5  | 17 | 0 | -6.973768 | -5.111238 | -0.361681 |
| 6  | 17 | 0 | -3.181880 | -2.220481 | 2.075924  |
| 7  | 17 | 0 | -3.092413 | 2.196362  | -2.040390 |
| 8  | 15 | 0 | 4.926200  | -0.002101 | 0.001291  |
| 9  | 7  | 0 | 0.471025  | -0.038960 | 0.056992  |
| 10 | 6  | 0 | -6.279061 | 2.662495  | 1.124071  |
| 11 | 6  | 0 | -2.360206 | -0.016938 | 0.029999  |
| 12 | 6  | 0 | -1.586434 | 0.937591  | 0.716836  |
| 13 | 6  | 0 | -0.207117 | 0.911536  | 0.719534  |
| 14 | 6  | 0 | -0.209160 | -0.980627 | -0.615965 |
| 15 | 6  | 0 | -1.588543 | -0.985257 | -0.639636 |
| 16 | 6  | 0 | -3.802662 | -0.002989 | 0.012719  |
| 17 | 6  | 0 | -4.555233 | -1.259879 | -0.096603 |
| 18 | 6  | 0 | -4.341413 | -2.346049 | 0.777779  |
| 19 | 6  | 0 | -5.559700 | -1.450694 | -1.066157 |
| 20 | 6  | 0 | -6.305129 | -2.617215 | -1.160644 |
| 21 | 6  | 0 | -6.050001 | -3.643643 | -0.263220 |
| 22 | 6  | 0 | -5.068564 | -3.522828 | 0.712226  |
| 23 | 6  | 0 | -4.532099 | 1.269021  | 0.103426  |
| 24 | 6  | 0 | -5.553785 | 1.481834  | 1.049925  |
| 25 | 6  | 0 | -5.984134 | 3.681056  | 0.229672  |
| 26 | 6  | 0 | -4.983079 | 3.538894  | -0.722604 |
| 27 | 6  | 0 | -4.277356 | 2.348229  | -0.768291 |
| 28 | 6  | 0 | 5.663873  | -0.551464 | 1.567449  |
| 29 | 6  | 0 | 5.099506  | -1.645512 | 2.232750  |
| 30 | 6  | 0 | 5.683907  | -2.124908 | 3.398918  |
| 31 | 6  | 0 | 6.826124  | -1.510506 | 3.908354  |
| 32 | 6  | 0 | 7.387785  | -0.420507 | 3.250155  |
| 33 | 6  | 0 | 6.811449  | 0.060306  | 2.078448  |
| 34 | 6  | 0 | 5.593595  | 1.655722  | -0.327911 |
| 35 | 6  | 0 | 4.975917  | 2.761936  | 0.265437  |
| 36 | 6  | 0 | 5.504326  | 4.034062  | 0.081661  |
| 37 | 6  | 0 | 5.597648  | -1.085040 | -1.294712 |
| 38 | 6  | 0 | 6.682488  | -1.931056 | -1.053701 |
| 39 | 6  | 0 | 7.194035  | -2.709975 | -2.088105 |
| 40 | 6  | 0 | 6.630955  | -2.641955 | -3.358546 |
| 41 | 6  | 0 | 5.551539  | -1.794643 | -3.602595 |
| 42 | 6  | 0 | 5.031815  | -1.020047 | -2.573419 |
| 43 | 6  | 0 | 6.740650  | 1.831711  | -1.106832 |
| 44 | 6  | 0 | 6.645606  | 4.206985  | -0.698283 |
| 45 | 6  | 0 | 7.262149  | 3.108605  | -1.290739 |
| 46 | 1  | 0 | -7.050004 | 2.787304  | 1.879434  |

|    |   |   |           |           |           |
|----|---|---|-----------|-----------|-----------|
| 47 | 1 | 0 | 0.353555  | 1.663130  | 1.268568  |
| 48 | 1 | 0 | 0.350174  | -1.741428 | -1.153487 |
| 49 | 1 | 0 | -7.060684 | -2.725095 | -1.933989 |
| 50 | 1 | 0 | -4.883617 | -4.325184 | 1.421021  |
| 51 | 1 | 0 | -4.766826 | 4.335235  | -1.429406 |
| 52 | 1 | 0 | 4.203337  | -2.124211 | 1.834485  |
| 53 | 1 | 0 | 5.243864  | -2.975966 | 3.914505  |
| 54 | 1 | 0 | 7.278852  | -1.883219 | 4.825036  |
| 55 | 1 | 0 | 8.279363  | 0.059109  | 3.648655  |
| 56 | 1 | 0 | 7.257264  | 0.910845  | 1.563532  |
| 57 | 1 | 0 | 4.080652  | 2.626593  | 0.874332  |
| 58 | 1 | 0 | 5.021206  | 4.892682  | 0.543355  |
| 59 | 1 | 0 | 7.130037  | -1.983436 | -0.061571 |
| 60 | 1 | 0 | 8.037148  | -3.370999 | -1.898205 |
| 61 | 1 | 0 | 7.033504  | -3.253044 | -4.163967 |
| 62 | 1 | 0 | 5.110983  | -1.741242 | -4.595993 |
| 63 | 1 | 0 | 4.185914  | -0.357223 | -2.764132 |
| 64 | 1 | 0 | 7.229008  | 0.973320  | -1.567924 |
| 65 | 1 | 0 | 7.055277  | 5.204206  | -0.846207 |
| 66 | 1 | 0 | 8.153796  | 3.244229  | -1.899288 |
| 67 | 9 | 0 | -2.188422 | 1.891548  | 1.410591  |
| 68 | 9 | 0 | -2.191893 | -1.930025 | -1.344628 |

---

Extracted results of TD-DFT calculation.

$\mathbf{1}^+$  (UM06/ SDD(Au), 6-31G(d)(H, C, N, F, Cl)) in dichloromethane

Excitation energies and oscillator strengths:

Excited State 1: 2.068-A 2.2454 eV 552.17 nm f=0.0543 <S\*\*2>=0.820  
236A ->238A 0.10499  
230B ->236B -0.12635  
233B ->236B 0.96879

This state for optimization and/or second-order correction.

Total Energy, E(TD-HF/TD-DFT) = -5000.69013090

Copying the excited state density for this state as the 1-particle RhoCI density.

Excited State 2: 2.062-A 2.3036 eV 538.23 nm f=0.0053 <S\*\*2>=0.813  
228B ->236B -0.15309  
232B ->236B 0.97392

Excited State 3: 2.059-A 2.4082 eV 514.83 nm f=0.0079 <S\*\*2>=0.810  
230B ->236B 0.89492  
231B ->236B 0.40159  
233B ->236B 0.13076

Excited State 4: 2.087-A 2.4777 eV 500.39 nm f=0.0502 <S\*\*2>=0.839  
236A ->237A 0.20535  
224B ->236B -0.10661  
227B ->236B 0.17473  
228B ->236B 0.91240  
232B ->236B 0.18562

Excited State 5: 2.069-A 2.4961 eV 496.70 nm f=0.0001 <S\*\*2>=0.820  
235B ->236B 0.99446

Excited State 6: 2.069-A 2.5095 eV 494.07 nm f=0.0000 <S\*\*2>=0.821  
234B ->236B 0.99544

Excited State 7: 2.081-A 2.7809 eV 445.84 nm f=0.0007 <S\*\*2>=0.833  
226B ->236B 0.16102  
229B ->236B 0.12738  
230B ->236B -0.38929  
231B ->236B 0.89235

Excited State 8: 2.070-A 2.8533 eV 434.52 nm f=0.0001 <S\*\*2>=0.821



|                   |          |           |           |          |              |  |
|-------------------|----------|-----------|-----------|----------|--------------|--|
| 229B ->236B       | 0.98993  |           |           |          |              |  |
| 231B ->236B       | -0.10408 |           |           |          |              |  |
| Excited State 9:  | 2.103-A  | 2.8869 eV | 429.47 nm | f=0.1623 | <S**2>=0.856 |  |
| 227A ->237A       | 0.11569  |           |           |          |              |  |
| 236A ->237A       | 0.80997  |           |           |          |              |  |
| 218B ->236B       | -0.11786 |           |           |          |              |  |
| 224B ->236B       | -0.32871 |           |           |          |              |  |
| 227B ->236B       | -0.34504 |           |           |          |              |  |
| 228B ->236B       | -0.16662 |           |           |          |              |  |
| Excited State 10: | 2.233-A  | 2.9989 eV | 413.44 nm | f=0.0095 | <S**2>=0.997 |  |
| 225A ->237A       | -0.18985 |           |           |          |              |  |
| 236A ->238A       | 0.11525  |           |           |          |              |  |
| 236A ->239A       | -0.10843 |           |           |          |              |  |
| 225B ->236B       | 0.94873  |           |           |          |              |  |
| 225B ->237B       | 0.10558  |           |           |          |              |  |
| Excited State 11: | 2.116-A  | 3.0775 eV | 402.87 nm | f=0.1361 | <S**2>=0.870 |  |
| 236A ->237A       | 0.33588  |           |           |          |              |  |
| 227B ->236B       | 0.88771  |           |           |          |              |  |
| 228B ->236B       | -0.26653 |           |           |          |              |  |
| Excited State 12: | 2.105-A  | 3.3080 eV | 374.81 nm | f=0.0007 | <S**2>=0.858 |  |
| 226B ->236B       | 0.97511  |           |           |          |              |  |
| 231B ->236B       | -0.15092 |           |           |          |              |  |
| Excited State 13: | 2.958-A  | 3.4158 eV | 362.97 nm | f=0.0655 | <S**2>=1.937 |  |
| 229A ->242A       | -0.21383 |           |           |          |              |  |
| 232A ->239A       | -0.10893 |           |           |          |              |  |
| 232A ->241A       | -0.22705 |           |           |          |              |  |
| 233A ->237A       | 0.21673  |           |           |          |              |  |
| 236A ->238A       | 0.62122  |           |           |          |              |  |
| 236A ->239A       | 0.23302  |           |           |          |              |  |
| 236A ->241A       | -0.11790 |           |           |          |              |  |
| 228B ->238B       | -0.20633 |           |           |          |              |  |
| 230B ->242B       | -0.18019 |           |           |          |              |  |
| 232B ->238B       | 0.11123  |           |           |          |              |  |
| 232B ->239B       | 0.12751  |           |           |          |              |  |
| 232B ->241B       | 0.16576  |           |           |          |              |  |
| 233B ->236B       | -0.15931 |           |           |          |              |  |
| 233B ->237B       | -0.25842 |           |           |          |              |  |
| 233B ->252B       | -0.12513 |           |           |          |              |  |

Excited State 14: 2.590-A 3.4335 eV 361.10 nm f=0.0857 <S\*\*2>=1.427

|             |          |
|-------------|----------|
| 227A ->237A | -0.17392 |
| 228A ->237A | -0.11381 |
| 232A ->242A | -0.13085 |
| 233A ->238A | 0.15606  |
| 236A ->237A | 0.27205  |
| 236A ->248A | 0.11938  |
| 236A ->250A | -0.10411 |
| 218B ->236B | 0.11929  |
| 224B ->236B | 0.73235  |
| 227B ->236B | -0.21418 |
| 228B ->237B | -0.14384 |
| 232B ->242B | -0.12617 |
| 233B ->238B | -0.16007 |

Excited State 15: 3.056-A 3.6854 eV 336.42 nm f=0.0420 <S\*\*2>=2.085

|             |          |
|-------------|----------|
| 229A ->238A | 0.11990  |
| 229A ->239A | 0.15798  |
| 229A ->241A | 0.25518  |
| 232A ->242A | 0.31186  |
| 233A ->238A | -0.21316 |
| 233A ->241A | 0.17329  |
| 236A ->237A | 0.25690  |
| 224B ->236B | 0.45267  |
| 228B ->236B | 0.11856  |
| 228B ->237B | 0.22366  |
| 230B ->238B | -0.14585 |
| 230B ->239B | -0.14660 |
| 230B ->241B | -0.20208 |
| 232B ->242B | 0.28703  |
| 233B ->238B | 0.24945  |
| 233B ->241B | -0.15306 |

**2<sup>+</sup> (UM06/ SDD(Au), 6-31G(d)(H, C, N, F, Cl)) in dichloromethane**

Excitation energies and oscillator strengths:

Excited State 1: 2.180-A 2.4839 eV 499.15 nm f=0.0493 <S\*\*2>=0.938

|             |          |
|-------------|----------|
| 212A ->214A | -0.17301 |
| 199B ->212B | 0.10852  |
| 204B ->212B | 0.24695  |

205B ->212B 0.90255  
205B ->213B 0.12739

This state for optimization and/or second-order correction.

Total Energy, E(TD-HF/TD-DFT) = -4763.34957774

Copying the excited state density for this state as the 1-particle RhoCI density.

Excited State 2: 2.173-A 2.5583 eV 484.64 nm f=0.0185 <S\*\*2>=0.930  
212A ->213A -0.17956  
200B ->212B 0.10872  
203B ->212B -0.50976  
206B ->212B 0.63456  
207B ->212B -0.46332

Excited State 3: 2.147-A 2.7068 eV 458.04 nm f=0.0202 <S\*\*2>=0.902  
212A ->213A 0.18257  
203B ->212B 0.73351  
206B ->212B 0.53751  
207B ->212B -0.25656

Excited State 4: 2.099-A 2.7226 eV 455.39 nm f=0.0072 <S\*\*2>=0.851  
201B ->212B -0.10072  
204B ->212B 0.93735  
205B ->212B -0.27956

Excited State 5: 2.095-A 2.8338 eV 437.52 nm f=0.0006 <S\*\*2>=0.847  
208B ->212B 0.46186  
210B ->212B -0.14968  
211B ->212B 0.86482

Excited State 6: 2.100-A 2.8358 eV 437.22 nm f=0.0010 <S\*\*2>=0.852  
202B ->212B -0.15568  
208B ->212B 0.80508  
210B ->212B -0.26456  
211B ->212B -0.49458

Excited State 7: 2.092-A 2.8434 eV 436.04 nm f=0.0001 <S\*\*2>=0.844  
208B ->212B 0.29596  
210B ->212B 0.95031

Excited State 8: 2.091-A 2.8573 eV 433.92 nm f=0.0000 <S\*\*2>=0.843  
209B ->212B 0.99487

Excited State 9: 2.309-A 2.9958 eV 413.85 nm f=0.0107 <S\*\*2>=1.083

|                   |          |           |           |          |              |
|-------------------|----------|-----------|-----------|----------|--------------|
| 201A ->213A       | 0.19448  |           |           |          |              |
| 201B ->212B       | 0.93786  |           |           |          |              |
| 201B ->213B       | -0.15465 |           |           |          |              |
| Excited State 10: | 2.184-A  | 3.0903 eV | 401.20 nm | f=0.1578 | <S**2>=0.942 |
| 202A ->213A       | 0.16750  |           |           |          |              |
| 212A ->213A       | 0.77054  |           |           |          |              |
| 180B ->212B       | -0.14279 |           |           |          |              |
| 200B ->212B       | -0.40007 |           |           |          |              |
| 203B ->212B       | -0.31512 |           |           |          |              |
| 206B ->212B       | 0.12551  |           |           |          |              |
| Excited State 11: | 2.141-A  | 3.2008 eV | 387.35 nm | f=0.0288 | <S**2>=0.896 |
| 212A ->213A       | -0.17697 |           |           |          |              |
| 206B ->212B       | 0.50441  |           |           |          |              |
| 207B ->212B       | 0.82530  |           |           |          |              |
| Excited State 12: | 2.365-A  | 3.2840 eV | 377.54 nm | f=0.0131 | <S**2>=1.149 |
| 204A ->219A       | -0.11313 |           |           |          |              |
| 205A ->215A       | 0.11158  |           |           |          |              |
| 212A ->214A       | 0.26920  |           |           |          |              |
| 202B ->212B       | 0.84688  |           |           |          |              |
| 202B ->213B       | -0.10861 |           |           |          |              |
| 203B ->214B       | -0.10617 |           |           |          |              |
| 204B ->218B       | 0.10305  |           |           |          |              |
| 205B ->212B       | 0.15137  |           |           |          |              |
| 205B ->213B       | -0.11187 |           |           |          |              |
| 208B ->212B       | 0.17359  |           |           |          |              |
| Excited State 13: | 2.856-A  | 3.3147 eV | 374.04 nm | f=0.0723 | <S**2>=1.789 |
| 202A ->214A       | -0.12578 |           |           |          |              |
| 204A ->219A       | -0.22072 |           |           |          |              |
| 205A ->215A       | 0.21870  |           |           |          |              |
| 206A ->213A       | -0.17677 |           |           |          |              |
| 206A ->226A       | 0.11917  |           |           |          |              |
| 212A ->214A       | 0.51376  |           |           |          |              |
| 202B ->212B       | -0.46466 |           |           |          |              |
| 203B ->214B       | -0.19697 |           |           |          |              |
| 204B ->212B       | 0.11656  |           |           |          |              |
| 204B ->218B       | 0.19851  |           |           |          |              |
| 205B ->212B       | 0.22384  |           |           |          |              |
| 205B ->213B       | -0.17379 |           |           |          |              |
| 205B ->228B       | -0.10411 |           |           |          |              |

206B ->216B 0.16801

Excited State 14: 3.045-A 3.3474 eV 370.39 nm f=0.0829 <S\*\*2>=2.069

202A ->213A -0.21550

204A ->214A -0.14765

204A ->215A 0.20769

205A ->219A -0.23355

206A ->214A -0.25950

212A ->213A 0.17927

212A ->224A 0.12759

212A ->226A -0.15696

180B ->212B 0.11587

200B ->212B 0.48518

201B ->219B 0.12105

203B ->212B -0.20804

203B ->213B 0.20946

204B ->214B 0.14564

204B ->216B 0.19742

205B ->214B 0.23474

205B ->216B -0.11773

206B ->212B 0.11028

206B ->218B 0.19076

207B ->212B 0.12194

207B ->218B -0.11388

Excited State 15: 3.479-A 3.4836 eV 355.91 nm f=0.0000 <S\*\*2>=2.776

208A ->222A -0.32158

208A ->224A 0.12475

209A ->227A -0.30576

210A ->225A 0.27287

210A ->228A -0.14548

211A ->220A 0.38167

208B ->222B -0.34944

209B ->226B 0.30572

210B ->224B -0.28273

210B ->227B 0.12751

211B ->220B -0.38181

**3<sup>+</sup>** (UM06/ SDD(Au), 6-31G(d)(H, C, N, F, Cl)) in dichloromethane

Excitation energies and oscillator strengths:

Excited State 1: 2.180-A 2.4859 eV 498.74 nm f=0.0504 <S\*\*2>=0.938  
194A ->196A -0.17270  
183B ->194B 0.10775  
190B ->194B 0.24654  
191B ->194B 0.90631  
191B ->195B 0.12850

This state for optimization and/or second-order correction.

Total Energy, E(TD-HF/TD-DFT) = -4534.89007263

Copying the excited state density for this state as the 1-particle RhoCI density.

Excited State 2: 2.173-A 2.5629 eV 483.76 nm f=0.0177 <S\*\*2>=0.930  
194A ->195A -0.17990  
185B ->194B 0.10761  
189B ->194B -0.51367  
192B ->194B 0.78517

Excited State 3: 2.149-A 2.7076 eV 457.92 nm f=0.0197 <S\*\*2>=0.904  
194A ->195A 0.18296  
189B ->194B 0.73730  
192B ->194B 0.59322

Excited State 4: 2.099-A 2.7261 eV 454.81 nm f=0.0075 <S\*\*2>=0.851  
190B ->194B 0.93847  
191B ->194B -0.27888

Excited State 5: 2.316-A 3.0033 eV 412.83 nm f=0.0115 <S\*\*2>=1.091  
187A ->195A 0.19696  
187B ->194B 0.93741  
187B ->195B -0.15750

Excited State 6: 2.103-A 3.0338 eV 408.68 nm f=0.0000 <S\*\*2>=0.855  
193B ->194B 0.99336

Excited State 7: 2.187-A 3.0866 eV 401.68 nm f=0.1721 <S\*\*2>=0.946  
188A ->195A 0.16746  
194A ->195A 0.78602  
162B ->194B 0.13945  
185B ->194B -0.39327  
189B ->194B -0.30689

Excited State 8: 2.172-A 3.2089 eV 386.38 nm f=0.0006 <S\*\*2>=0.930  
188B ->194B 0.96864  
188B ->195B -0.13383

Excited State 9: 3.016-A 3.3106 eV 374.51 nm f=0.0863 <S\*\*2>=2.024

|             |          |
|-------------|----------|
| 188A ->196A | -0.14160 |
| 190A ->201A | 0.24548  |
| 191A ->197A | -0.24506 |
| 192A ->195A | -0.20120 |
| 192A ->203A | 0.10912  |
| 192A ->205A | -0.13768 |
| 194A ->196A | 0.57235  |
| 188B ->194B | -0.15777 |
| 189B ->196B | -0.22245 |
| 190B ->194B | 0.13780  |
| 190B ->200B | 0.22142  |
| 191B ->194B | 0.26055  |
| 191B ->195B | -0.20246 |
| 191B ->206B | 0.13793  |
| 192B ->196B | 0.12672  |
| 192B ->197B | 0.21289  |

Excited State 10: 3.065-A 3.3416 eV 371.04 nm f=0.0997 <S\*\*2>=2.099

|             |          |
|-------------|----------|
| 188A ->195A | -0.21796 |
| 190A ->196A | -0.15019 |
| 190A ->197A | 0.20556  |
| 191A ->201A | -0.24000 |
| 192A ->196A | -0.26400 |
| 194A ->195A | 0.19973  |
| 194A ->203A | -0.15181 |
| 194A ->205A | 0.16267  |
| 162B ->194B | -0.11426 |
| 185B ->194B | 0.49303  |
| 187B ->201B | -0.12332 |
| 189B ->194B | -0.20035 |
| 189B ->195B | 0.21206  |
| 189B ->206B | -0.11227 |
| 190B ->196B | 0.14737  |
| 190B ->197B | 0.19258  |
| 191B ->196B | 0.23610  |
| 191B ->197B | -0.12085 |
| 192B ->200B | 0.22390  |

Excited State 11: 2.695-A 3.7103 eV 334.16 nm f=0.1831 <S\*\*2>=1.566

|             |          |
|-------------|----------|
| 190A ->197A | -0.22200 |
| 191A ->201A | 0.26065  |

|             |          |
|-------------|----------|
| 192A ->196A | 0.11594  |
| 194A ->195A | 0.47925  |
| 185B ->194B | 0.57347  |
| 187B ->201B | -0.11791 |
| 189B ->194B | 0.11700  |
| 190B ->196B | -0.11921 |
| 190B ->197B | -0.21323 |
| 191B ->196B | -0.14197 |
| 191B ->197B | 0.10330  |
| 192B ->200B | -0.24841 |

Excited State 12: 2.809-A 3.9442 eV 314.34 nm f=0.0497 <S\*\*2>=1.723

|             |          |
|-------------|----------|
| 190A ->201A | -0.24820 |
| 191A ->197A | 0.28311  |
| 192A ->201A | 0.16200  |
| 194A ->196A | 0.64790  |
| 194A ->197A | -0.17889 |
| 183B ->194B | 0.26488  |
| 189B ->197B | -0.13266 |
| 190B ->200B | -0.26429 |
| 191B ->200B | 0.15736  |
| 192B ->197B | -0.30452 |

Excited State 13: 2.561-A 3.9845 eV 311.16 nm f=0.0093 <S\*\*2>=1.390

|             |          |
|-------------|----------|
| 190A ->201A | -0.14793 |
| 192A ->201A | -0.15803 |
| 194A ->197A | 0.85415  |
| 189B ->197B | 0.10003  |
| 190B ->195B | 0.12186  |
| 190B ->200B | -0.14010 |
| 191B ->200B | -0.10859 |
| 192B ->196B | -0.20705 |
| 192B ->197B | -0.10195 |

Excited State 14: 2.094-A 4.0565 eV 305.64 nm f=0.0001 <S\*\*2>=0.846

|             |         |
|-------------|---------|
| 186B ->194B | 0.99478 |
|-------------|---------|

Excited State 15: 2.396-A 4.1111 eV 301.59 nm f=0.0077 <S\*\*2>=1.185

|             |          |
|-------------|----------|
| 187A ->195A | -0.23862 |
| 188A ->197A | -0.10695 |
| 188A ->200A | 0.10781  |
| 192A ->195A | -0.12408 |
| 194A ->196A | -0.12370 |



|             |          |
|-------------|----------|
| 194A ->197A | -0.11676 |
| 194A ->199A | -0.41632 |
| 194A ->200A | 0.67689  |
| 183B ->194B | 0.33548  |

**4<sup>+</sup> (UM06/ SDD(Au), 6-31G(d)(H, C, N, F, Cl)) in dichloromethane**

Excitation energies and oscillator strengths:

|               |    |          |           |           |          |              |
|---------------|----|----------|-----------|-----------|----------|--------------|
| Excited State | 1: | 2.175-A  | 2.4740 eV | 501.15 nm | f=0.0490 | <S**2>=0.933 |
| 237A ->239A   |    | -0.17009 |           |           |          |              |
| 224B ->237B   |    | -0.10853 |           |           |          |              |
| 229B ->237B   |    | -0.25217 |           |           |          |              |
| 230B ->237B   |    | 0.89488  |           |           |          |              |
| 230B ->238B   |    | -0.12794 |           |           |          |              |
| 232B ->237B   |    | -0.11995 |           |           |          |              |

This state for optimization and/or second-order correction.

Total Energy, E(TD-HF/TD-DFT) = -5000.22826960

Copying the excited state density for this state as the 1-particle RhoCI density.

|               |    |          |           |           |          |              |
|---------------|----|----------|-----------|-----------|----------|--------------|
| Excited State | 2: | 2.167-A  | 2.5473 eV | 486.74 nm | f=0.0191 | <S**2>=0.924 |
| 237A ->238A   |    | 0.17136  |           |           |          |              |
| 225B ->237B   |    | -0.10303 |           |           |          |              |
| 228B ->237B   |    | 0.50453  |           |           |          |              |
| 231B ->237B   |    | 0.79375  |           |           |          |              |

|               |    |          |           |           |          |              |
|---------------|----|----------|-----------|-----------|----------|--------------|
| Excited State | 3: | 2.146-A  | 2.6957 eV | 459.93 nm | f=0.0216 | <S**2>=0.901 |
| 237A ->238A   |    | 0.17862  |           |           |          |              |
| 228B ->237B   |    | 0.74724  |           |           |          |              |
| 231B ->237B   |    | -0.58063 |           |           |          |              |

|               |    |         |           |           |          |              |
|---------------|----|---------|-----------|-----------|----------|--------------|
| Excited State | 4: | 2.098-A | 2.7096 eV | 457.58 nm | f=0.0071 | <S**2>=0.851 |
| 226B ->237B   |    | 0.10141 |           |           |          |              |
| 229B ->237B   |    | 0.93385 |           |           |          |              |
| 230B ->237B   |    | 0.28878 |           |           |          |              |

|               |    |         |           |           |          |              |
|---------------|----|---------|-----------|-----------|----------|--------------|
| Excited State | 5: | 2.095-A | 2.7456 eV | 451.58 nm | f=0.0000 | <S**2>=0.848 |
| 235B ->237B   |    | 0.18939 |           |           |          |              |
| 236B ->237B   |    | 0.97704 |           |           |          |              |

|               |    |         |           |           |          |              |
|---------------|----|---------|-----------|-----------|----------|--------------|
| Excited State | 6: | 2.095-A | 2.7649 eV | 448.42 nm | f=0.0000 | <S**2>=0.847 |
| 235B ->237B   |    | 0.97998 |           |           |          |              |

|                   |          |           |           |          |              |  |
|-------------------|----------|-----------|-----------|----------|--------------|--|
| 236B ->237B       | -0.19011 |           |           |          |              |  |
| Excited State 7:  | 2.123-A  | 2.8375 eV | 436.94 nm | f=0.0006 | <S**2>=0.877 |  |
| 227B ->237B       | 0.22874  |           |           |          |              |  |
| 232B ->237B       | -0.17674 |           |           |          |              |  |
| 234B ->237B       | 0.93998  |           |           |          |              |  |
| Excited State 8:  | 2.308-A  | 2.9889 eV | 414.82 nm | f=0.0110 | <S**2>=1.082 |  |
| 226A ->238A       | -0.19276 |           |           |          |              |  |
| 237A ->242A       | -0.10592 |           |           |          |              |  |
| 226B ->237B       | 0.93628  |           |           |          |              |  |
| 226B ->238B       | 0.14666  |           |           |          |              |  |
| Excited State 9:  | 2.097-A  | 3.0481 eV | 406.76 nm | f=0.0000 | <S**2>=0.849 |  |
| 233B ->237B       | 0.99716  |           |           |          |              |  |
| Excited State 10: | 2.183-A  | 3.0807 eV | 402.46 nm | f=0.1840 | <S**2>=0.941 |  |
| 227A ->238A       | 0.16336  |           |           |          |              |  |
| 237A ->238A       | 0.79079  |           |           |          |              |  |
| 200B ->237B       | 0.13827  |           |           |          |              |  |
| 214B ->237B       | -0.11227 |           |           |          |              |  |
| 225B ->237B       | -0.38542 |           |           |          |              |  |
| 228B ->237B       | -0.30240 |           |           |          |              |  |
| Excited State 11: | 2.125-A  | 3.1219 eV | 397.15 nm | f=0.0005 | <S**2>=0.879 |  |
| 227B ->237B       | -0.22137 |           |           |          |              |  |
| 232B ->237B       | 0.93154  |           |           |          |              |  |
| 234B ->237B       | 0.23982  |           |           |          |              |  |
| Excited State 12: | 3.026-A  | 3.3050 eV | 375.14 nm | f=0.0802 | <S**2>=2.040 |  |
| 227A ->239A       | -0.14397 |           |           |          |              |  |
| 229A ->243A       | 0.24474  |           |           |          |              |  |
| 230A ->238A       | -0.19704 |           |           |          |              |  |
| 230A ->251A       | -0.12390 |           |           |          |              |  |
| 231A ->240A       | -0.24254 |           |           |          |              |  |
| 231A ->242A       | 0.11228  |           |           |          |              |  |
| 237A ->239A       | 0.57549  |           |           |          |              |  |
| 228B ->239B       | -0.22486 |           |           |          |              |  |
| 229B ->237B       | -0.14237 |           |           |          |              |  |
| 229B ->243B       | -0.22274 |           |           |          |              |  |
| 230B ->237B       | 0.27146  |           |           |          |              |  |
| 230B ->238B       | 0.20054  |           |           |          |              |  |
| 230B ->252B       | 0.12263  |           |           |          |              |  |

231B ->239B -0.13204  
231B ->240B 0.22012

Excited State 13: 3.060-A 3.3376 eV 371.48 nm f=0.1003 <S\*\*2>=2.091

226A ->242A -0.10386  
227A ->238A -0.21522  
229A ->239A 0.15089  
229A ->240A -0.20543  
230A ->239A -0.26238  
231A ->243A 0.23409  
237A ->238A 0.19265  
237A ->247A -0.13634  
237A ->251A 0.14948  
200B ->237B -0.11514  
225B ->237B 0.49622  
228B ->237B -0.19174  
228B ->238B -0.20671  
229B ->239B -0.14876  
229B ->240B 0.19923  
230B ->239B 0.23568  
230B ->240B 0.11726  
231B ->243B -0.22298

Excited State 14: 2.141-A 3.3783 eV 367.00 nm f=0.0022 <S\*\*2>=0.896

227B ->237B 0.92903  
227B ->238B 0.10529  
232B ->237B 0.26786  
234B ->237B -0.18398

Excited State 15: 3.479-A 3.4736 eV 356.94 nm f=0.0000 <S\*\*2>=2.776

233A ->245A -0.25248  
233A ->249A -0.15102  
234A ->245A -0.15481  
234A ->249A -0.18397  
235A ->250A 0.33064  
235A ->252A -0.19096  
236A ->241A 0.10157  
236A ->250A 0.19822  
236A ->252A -0.22158  
233B ->245B -0.25737  
233B ->246B -0.10093  
233B ->247B 0.15282  
234B ->245B -0.15785

|             |          |
|-------------|----------|
| 234B ->246B | -0.10706 |
| 234B ->247B | 0.18633  |
| 235B ->250B | -0.32577 |
| 235B ->251B | 0.20412  |
| 236B ->241B | -0.10201 |
| 236B ->250B | -0.19399 |
| 236B ->251B | 0.23690  |

**5<sup>+</sup> (UM06/ SDD(Au), 6-31G(d)(H, C, N, F, Cl)) in dichloromethane**

Excitation energies and oscillator strengths:

|                  |          |           |           |          |              |
|------------------|----------|-----------|-----------|----------|--------------|
| Excited State 1: | 2.177-A  | 2.4815 eV | 499.64 nm | f=0.0514 | <S**2>=0.935 |
| 169A ->172A      | 0.17207  |           |           |          |              |
| 159B ->169B      | -0.10924 |           |           |          |              |
| 164B ->169B      | -0.24943 |           |           |          |              |
| 165B ->169B      | 0.90657  |           |           |          |              |
| 165B ->170B      | -0.12873 |           |           |          |              |

This state for optimization and/or second-order correction.

Total Energy, E(TD-HF/TD-DFT) = -4297.99464495

Copying the excited state density for this state as the 1-particle RhoCI density.

|                  |          |           |           |          |              |
|------------------|----------|-----------|-----------|----------|--------------|
| Excited State 2: | 2.170-A  | 2.5595 eV | 484.41 nm | f=0.0178 | <S**2>=0.927 |
| 169A ->170A      | 0.17790  |           |           |          |              |
| 160B ->169B      | 0.10909  |           |           |          |              |
| 163B ->169B      | -0.50852 |           |           |          |              |
| 166B ->169B      | 0.78999  |           |           |          |              |

|                  |          |           |           |          |              |
|------------------|----------|-----------|-----------|----------|--------------|
| Excited State 3: | 2.149-A  | 2.7032 eV | 458.66 nm | f=0.0203 | <S**2>=0.904 |
| 169A ->170A      | -0.18505 |           |           |          |              |
| 163B ->169B      | 0.74111  |           |           |          |              |
| 166B ->169B      | 0.58703  |           |           |          |              |

|                  |         |           |           |          |              |
|------------------|---------|-----------|-----------|----------|--------------|
| Excited State 4: | 2.098-A | 2.7199 eV | 455.84 nm | f=0.0076 | <S**2>=0.850 |
| 164B ->169B      | 0.93832 |           |           |          |              |
| 165B ->169B      | 0.28163 |           |           |          |              |

|                  |         |           |           |          |              |
|------------------|---------|-----------|-----------|----------|--------------|
| Excited State 5: | 2.096-A | 2.9742 eV | 416.86 nm | f=0.0001 | <S**2>=0.848 |
| 168B ->169B      | 0.99671 |           |           |          |              |

|                  |          |           |           |          |              |
|------------------|----------|-----------|-----------|----------|--------------|
| Excited State 6: | 2.321-A  | 3.0079 eV | 412.19 nm | f=0.0119 | <S**2>=1.097 |
| 161A ->170A      | -0.20131 |           |           |          |              |

|                   |          |           |           |          |              |  |
|-------------------|----------|-----------|-----------|----------|--------------|--|
| 161B ->169B       | 0.93671  |           |           |          |              |  |
| 161B ->170B       | 0.15949  |           |           |          |              |  |
| Excited State 7:  | 2.091-A  | 3.0733 eV | 403.42 nm | f=0.0000 | <S**2>=0.843 |  |
| 167B ->169B       | 0.99783  |           |           |          |              |  |
| Excited State 8:  | 2.187-A  | 3.0795 eV | 402.61 nm | f=0.1844 | <S**2>=0.945 |  |
| 162A ->170A       | 0.16609  |           |           |          |              |  |
| 169A ->170A       | 0.79461  |           |           |          |              |  |
| 146B ->169B       | -0.13737 |           |           |          |              |  |
| 153B ->169B       | 0.11028  |           |           |          |              |  |
| 160B ->169B       | 0.38106  |           |           |          |              |  |
| 163B ->169B       | 0.31030  |           |           |          |              |  |
| Excited State 9:  | 2.475-A  | 3.2873 eV | 377.16 nm | f=0.0200 | <S**2>=1.281 |  |
| 164A ->176A       | -0.13728 |           |           |          |              |  |
| 165A ->173A       | -0.13529 |           |           |          |              |  |
| 166A ->170A       | 0.11867  |           |           |          |              |  |
| 169A ->172A       | 0.32593  |           |           |          |              |  |
| 162B ->169B       | 0.80278  |           |           |          |              |  |
| 162B ->170B       | 0.11205  |           |           |          |              |  |
| 163B ->172B       | 0.12988  |           |           |          |              |  |
| 164B ->175B       | -0.12487 |           |           |          |              |  |
| 165B ->169B       | -0.16460 |           |           |          |              |  |
| 165B ->170B       | -0.13465 |           |           |          |              |  |
| 166B ->173B       | 0.12205  |           |           |          |              |  |
| Excited State 10: | 2.779-A  | 3.3175 eV | 373.73 nm | f=0.0677 | <S**2>=1.680 |  |
| 162A ->172A       | 0.11652  |           |           |          |              |  |
| 164A ->176A       | 0.20584  |           |           |          |              |  |
| 165A ->173A       | 0.20419  |           |           |          |              |  |
| 166A ->170A       | -0.16705 |           |           |          |              |  |
| 166A ->181A       | -0.11432 |           |           |          |              |  |
| 169A ->172A       | -0.47808 |           |           |          |              |  |
| 162B ->169B       | 0.56569  |           |           |          |              |  |
| 163B ->172B       | -0.18500 |           |           |          |              |  |
| 164B ->169B       | -0.11232 |           |           |          |              |  |
| 164B ->175B       | 0.18488  |           |           |          |              |  |
| 165B ->169B       | 0.20932  |           |           |          |              |  |
| 165B ->170B       | 0.16069  |           |           |          |              |  |
| 165B ->183B       | 0.11750  |           |           |          |              |  |
| 166B ->172B       | 0.10553  |           |           |          |              |  |
| 166B ->173B       | -0.18124 |           |           |          |              |  |

Excited State 11: 3.063-A 3.3421 eV 370.98 nm f=0.0999 <S\*\*2>=2.095

|             |          |
|-------------|----------|
| 162A ->170A | 0.22077  |
| 164A ->172A | 0.15191  |
| 164A ->173A | -0.20293 |
| 165A ->176A | -0.23848 |
| 166A ->172A | -0.26259 |
| 169A ->170A | -0.18882 |
| 169A ->179A | -0.15243 |
| 169A ->181A | -0.16265 |
| 146B ->169B | -0.11767 |
| 160B ->169B | 0.50123  |
| 161B ->176B | -0.12417 |
| 163B ->169B | -0.19415 |
| 163B ->170B | -0.21266 |
| 163B ->183B | -0.11255 |
| 164B ->172B | -0.14952 |
| 164B ->173B | 0.19455  |
| 165B ->172B | 0.23500  |
| 165B ->173B | 0.11858  |
| 166B ->175B | -0.22284 |

Excited State 12: 3.479-A 3.4571 eV 358.64 nm f=0.0000 <S\*\*2>=2.775

|             |          |
|-------------|----------|
| 167A ->171A | -0.53054 |
| 167A ->178A | 0.32569  |
| 167A ->185A | -0.16829 |
| 168A ->182A | -0.25504 |
| 167B ->171B | 0.53070  |
| 167B ->178B | -0.32587 |
| 167B ->185B | 0.16827  |
| 168B ->181B | 0.25517  |

Excited State 13: 2.703-A 3.7069 eV 334.47 nm f=0.1900 <S\*\*2>=1.576

|             |          |
|-------------|----------|
| 164A ->173A | 0.22030  |
| 164A ->174A | -0.10346 |
| 165A ->176A | 0.26183  |
| 166A ->172A | 0.11712  |
| 169A ->170A | -0.47123 |
| 160B ->169B | 0.57645  |
| 161B ->176B | -0.11847 |
| 163B ->169B | 0.12081  |
| 164B ->172B | 0.12183  |
| 164B ->173B | -0.21633 |

|                   |          |           |           |          |              |  |
|-------------------|----------|-----------|-----------|----------|--------------|--|
| 165B ->172B       | -0.14343 |           |           |          |              |  |
| 165B ->173B       | -0.10313 |           |           |          |              |  |
| 166B ->175B       | 0.24923  |           |           |          |              |  |
| Excited State 14: | 3.479-A  | 3.9087 eV | 317.20 nm | f=0.0000 | <S**2>=2.776 |  |
| 168A ->171A       | 0.66116  |           |           |          |              |  |
| 168A ->178A       | -0.21885 |           |           |          |              |  |
| 168B ->171B       | -0.66106 |           |           |          |              |  |
| 168B ->178B       | 0.21883  |           |           |          |              |  |
| Excited State 15: | 2.809-A  | 3.9446 eV | 314.31 nm | f=0.0490 | <S**2>=1.723 |  |
| 164A ->176A       | 0.24723  |           |           |          |              |  |
| 165A ->173A       | 0.28063  |           |           |          |              |  |
| 165A ->174A       | -0.12031 |           |           |          |              |  |
| 166A ->176A       | 0.16438  |           |           |          |              |  |
| 169A ->172A       | 0.64457  |           |           |          |              |  |
| 169A ->173A       | -0.17786 |           |           |          |              |  |
| 169A ->174A       | 0.10276  |           |           |          |              |  |
| 159B ->169B       | 0.27811  |           |           |          |              |  |
| 163B ->173B       | -0.13235 |           |           |          |              |  |
| 164B ->175B       | 0.26293  |           |           |          |              |  |
| 165B ->175B       | 0.15933  |           |           |          |              |  |
| 166B ->173B       | -0.30645 |           |           |          |              |  |

[Au<sup>I</sup>(F<sub>2</sub>PyBTM)PPh<sub>3</sub>]<sup>+</sup> (UM06 / SDD(Au), 6-31G(d)(H, C, N, F, P, Cl)) in dichloromethane

Excitation energies and oscillator strengths:

|                  |          |           |           |          |              |
|------------------|----------|-----------|-----------|----------|--------------|
| Excited State 1: | 2.174-A  | 2.4732 eV | 501.31 nm | f=0.0506 | <S**2>=0.931 |
| 199A ->201A      | 0.16229  |           |           |          |              |
| 185B ->199B      | -0.10960 |           |           |          |              |
| 193B ->199B      | -0.25022 |           |           |          |              |
| 196B ->199B      | 0.90779  |           |           |          |              |
| 196B ->200B      | -0.12806 |           |           |          |              |

This state for optimization and/or second-order correction.

Total Energy, E(TD-HF/TD-DFT) = -4875.56532464

Copying the excited state density for this state as the 1-particle RhoCI density.

|                  |          |           |           |          |              |
|------------------|----------|-----------|-----------|----------|--------------|
| Excited State 2: | 2.164-A  | 2.5449 eV | 487.19 nm | f=0.0199 | <S**2>=0.921 |
| 199A ->200A      | -0.16530 |           |           |          |              |
| 186B ->199B      | 0.10791  |           |           |          |              |
| 192B ->199B      | 0.50180  |           |           |          |              |

|                  |          |           |           |          |              |  |  |
|------------------|----------|-----------|-----------|----------|--------------|--|--|
| 197B ->199B      | 0.79712  |           |           |          |              |  |  |
| Excited State 3: | 2.144-A  | 2.6904 eV | 460.84 nm | f=0.0233 | <S**2>=0.899 |  |  |
| 199A ->200A      | -0.17236 |           |           |          |              |  |  |
| 192B ->199B      | 0.74916  |           |           |          |              |  |  |
| 197B ->199B      | -0.57628 |           |           |          |              |  |  |
| Excited State 4: | 2.097-A  | 2.7077 eV | 457.89 nm | f=0.0074 | <S**2>=0.850 |  |  |
| 193B ->199B      | 0.93748  |           |           |          |              |  |  |
| 196B ->199B      | 0.28070  |           |           |          |              |  |  |
| Excited State 5: | 2.108-A  | 2.8711 eV | 431.84 nm | f=0.0006 | <S**2>=0.861 |  |  |
| 187B ->199B      | -0.12922 |           |           |          |              |  |  |
| 198B ->199B      | 0.98810  |           |           |          |              |  |  |
| Excited State 6: | 2.312-A  | 2.9923 eV | 414.35 nm | f=0.0119 | <S**2>=1.086 |  |  |
| 188A ->200A      | -0.18257 |           |           |          |              |  |  |
| 199A ->206A      | -0.10397 |           |           |          |              |  |  |
| 188B ->199B      | 0.93895  |           |           |          |              |  |  |
| 188B ->200B      | 0.15070  |           |           |          |              |  |  |
| Excited State 7: | 2.192-A  | 3.0884 eV | 401.45 nm | f=0.1919 | <S**2>=0.951 |  |  |
| 189A ->200A      | 0.15938  |           |           |          |              |  |  |
| 199A ->200A      | 0.79682  |           |           |          |              |  |  |
| 168B ->199B      | 0.11566  |           |           |          |              |  |  |
| 186B ->199B      | -0.37400 |           |           |          |              |  |  |
| 192B ->199B      | 0.29194  |           |           |          |              |  |  |
| Excited State 8: | 3.044-A  | 3.3051 eV | 375.13 nm | f=0.0806 | <S**2>=2.067 |  |  |
| 189A ->201A      | -0.13655 |           |           |          |              |  |  |
| 193A ->207A      | -0.24815 |           |           |          |              |  |  |
| 196A ->200A      | 0.20426  |           |           |          |              |  |  |
| 196A ->212A      | -0.10777 |           |           |          |              |  |  |
| 196A ->216A      | -0.11519 |           |           |          |              |  |  |
| 197A ->204A      | -0.17100 |           |           |          |              |  |  |
| 197A ->205A      | 0.17854  |           |           |          |              |  |  |
| 197A ->206A      | -0.11421 |           |           |          |              |  |  |
| 199A ->201A      | 0.55643  |           |           |          |              |  |  |
| 199A ->202A      | -0.14915 |           |           |          |              |  |  |
| 192B ->201B      | 0.17089  |           |           |          |              |  |  |
| 192B ->202B      | -0.15343 |           |           |          |              |  |  |
| 193B ->199B      | 0.13793  |           |           |          |              |  |  |
| 193B ->207B      | -0.22378 |           |           |          |              |  |  |



|                   |          |           |           |          |              |  |
|-------------------|----------|-----------|-----------|----------|--------------|--|
| 196B ->199B       | -0.26237 |           |           |          |              |  |
| 196B ->200B       | -0.20789 |           |           |          |              |  |
| 196B ->216B       | -0.13851 |           |           |          |              |  |
| 197B ->201B       | 0.10713  |           |           |          |              |  |
| 197B ->205B       | 0.22554  |           |           |          |              |  |
| Excited State 9:  | 2.239-A  | 3.3212 eV | 373.31 nm | f=0.0205 | <S**2>=1.003 |  |
| 186B ->199B       | 0.17140  |           |           |          |              |  |
| 195B ->199B       | 0.93222  |           |           |          |              |  |
| Excited State 10: | 2.130-A  | 3.3270 eV | 372.66 nm | f=0.0043 | <S**2>=0.884 |  |
| 194B ->199B       | 0.98311  |           |           |          |              |  |
| Excited State 11: | 2.938-A  | 3.3469 eV | 370.44 nm | f=0.0725 | <S**2>=1.909 |  |
| 189A ->200A       | -0.19905 |           |           |          |              |  |
| 193A ->201A       | -0.13554 |           |           |          |              |  |
| 193A ->204A       | -0.13383 |           |           |          |              |  |
| 193A ->205A       | 0.13954  |           |           |          |              |  |
| 196A ->201A       | 0.23497  |           |           |          |              |  |
| 197A ->207A       | -0.22014 |           |           |          |              |  |
| 199A ->200A       | 0.14675  |           |           |          |              |  |
| 199A ->212A       | -0.13614 |           |           |          |              |  |
| 199A ->216A       | -0.12375 |           |           |          |              |  |
| 186B ->199B       | 0.44991  |           |           |          |              |  |
| 188B ->208B       | 0.10606  |           |           |          |              |  |
| 192B ->199B       | 0.18990  |           |           |          |              |  |
| 192B ->200B       | 0.19489  |           |           |          |              |  |
| 192B ->216B       | 0.10140  |           |           |          |              |  |
| 193B ->201B       | 0.11059  |           |           |          |              |  |
| 193B ->205B       | 0.18814  |           |           |          |              |  |
| 194B ->199B       | 0.16611  |           |           |          |              |  |
| 195B ->199B       | -0.35334 |           |           |          |              |  |
| 196B ->201B       | -0.16550 |           |           |          |              |  |
| 196B ->202B       | 0.14843  |           |           |          |              |  |
| 196B ->205B       | 0.10295  |           |           |          |              |  |
| 197B ->207B       | -0.20648 |           |           |          |              |  |
| Excited State 12: | 3.476-A  | 3.4715 eV | 357.15 nm | f=0.0000 | <S**2>=2.770 |  |
| 190A ->204A       | -0.13386 |           |           |          |              |  |
| 190A ->205A       | -0.11234 |           |           |          |              |  |
| 190A ->210A       | -0.11278 |           |           |          |              |  |
| 191A ->203A       | 0.18636  |           |           |          |              |  |
| 191A ->210A       | -0.11474 |           |           |          |              |  |

|             |          |
|-------------|----------|
| 192A ->208A | 0.11798  |
| 192A ->211A | -0.15884 |
| 192A ->215A | -0.10543 |
| 195A ->211A | -0.10057 |
| 195A ->214A | -0.11054 |
| 195A ->215A | -0.21634 |
| 198A ->202A | 0.22636  |
| 198A ->203A | 0.10468  |
| 198A ->204A | -0.12285 |
| 198A ->208A | -0.12280 |
| 198A ->210A | -0.10724 |
| 198A ->211A | -0.10178 |
| 189B ->204B | 0.16626  |
| 189B ->210B | 0.10666  |
| 190B ->203B | -0.19383 |
| 190B ->204B | 0.10748  |
| 190B ->210B | 0.11860  |
| 191B ->206B | -0.11268 |
| 191B ->211B | 0.15947  |
| 195B ->211B | 0.10095  |
| 195B ->212B | 0.12108  |
| 195B ->214B | 0.20179  |
| 198B ->201B | -0.14390 |
| 198B ->202B | -0.18627 |
| 198B ->203B | -0.10869 |
| 198B ->204B | 0.13229  |
| 198B ->206B | 0.12544  |
| 198B ->210B | 0.10701  |
| 198B ->211B | 0.10544  |

Excited State 13: 3.414-A 3.4799 eV 356.29 nm f=0.0000 <S\*\*2>=2.664

|             |          |
|-------------|----------|
| 190A ->202A | 0.13145  |
| 190A ->204A | 0.15129  |
| 190A ->205A | 0.18426  |
| 190A ->208A | -0.10460 |
| 190A ->209A | -0.12055 |
| 190A ->211A | -0.11597 |
| 192A ->214A | -0.17468 |
| 194A ->208A | 0.14949  |
| 194A ->211A | -0.13681 |
| 194A ->214A | 0.18977  |
| 198A ->204A | -0.17900 |
| 198A ->205A | -0.19488 |

|             |          |
|-------------|----------|
| 198A ->209A | 0.12795  |
| 189B ->202B | -0.10793 |
| 189B ->204B | -0.24459 |
| 189B ->206B | 0.11291  |
| 189B ->209B | 0.11413  |
| 189B ->211B | 0.11710  |
| 191B ->199B | 0.22580  |
| 191B ->212B | 0.16974  |
| 194B ->206B | -0.13769 |
| 194B ->211B | 0.13741  |
| 194B ->212B | -0.18895 |
| 198B ->204B | 0.26927  |
| 198B ->209B | -0.12018 |

Excited State 14: 3.460-A 3.4819 eV 356.08 nm f=0.0000 <S\*\*2>=2.742

|             |          |
|-------------|----------|
| 190A ->203A | -0.12109 |
| 191A ->202A | -0.14318 |
| 191A ->203A | 0.21719  |
| 191A ->209A | -0.13847 |
| 191A ->211A | 0.11158  |
| 192A ->215A | 0.15008  |
| 194A ->211A | -0.14416 |
| 194A ->214A | -0.11441 |
| 194A ->215A | 0.12423  |
| 194A ->216A | 0.11653  |
| 195A ->208A | -0.13299 |
| 195A ->211A | 0.12327  |
| 198A ->203A | -0.26019 |
| 198A ->210A | 0.13340  |
| 189B ->203B | 0.13176  |
| 190B ->202B | 0.11362  |
| 190B ->203B | -0.20777 |
| 190B ->204B | -0.10329 |
| 190B ->209B | 0.13948  |
| 190B ->211B | -0.11171 |
| 191B ->199B | 0.10848  |
| 191B ->214B | -0.14010 |
| 191B ->215B | -0.11002 |
| 194B ->211B | 0.14423  |
| 194B ->214B | -0.11687 |
| 194B ->215B | -0.13396 |
| 195B ->206B | 0.12852  |
| 195B ->211B | -0.12485 |

198B ->203B 0.26347

198B ->210B -0.12756

Excited State 15: 2.205-A 3.5056 eV 353.67 nm f=0.0001 <S\*\*2>=0.966

191B ->199B 0.96428
